# Supplementary material for: TXNIP Suppresses the Osteochondrogenic Switch of Vascular Smooth Muscle Cells in Atherosclerosis
Source: PubMed Central journal article supplement — Circ Res. 2022 Dec 1;132(1):52–71. doi: 10.1161/CIRCRESAHA.122.321538 (PMC9829043; doi:10.1161/circresaha.122.321538), 2022-12-01
Supplement: res-132-052-s003.pdf [file res-132-052-s003.pdf]

## Supplemental Materials

### TXNIP suppresses the osteochondrogenic switch of VSMCs in atherosclerosis

Sang-Ho Woo<sup>1, †</sup>, Dongsoo Kyung<sup>2, †</sup>, Seung Hyun Lee<sup>3</sup>, Kyu Seong Park<sup>3</sup>, Minkyu Kim<sup>3</sup>,  
Kibyeong Kim<sup>3</sup>, Hyo-Jung Kwon<sup>4</sup>, Young-Suk Won<sup>5</sup>, Inpyo Choi<sup>6</sup>, Young-Jun Park<sup>7</sup>, Du-Min  
Go<sup>1</sup>, Jeong-Seop Oh<sup>1</sup>, Won Kee Yoon<sup>5</sup>, Seung Sam Paik<sup>8</sup>, Ji Hyeon Kim<sup>8</sup>, Yong-Hwan Kim<sup>9</sup>,  
Jae-Hoon Choi<sup>3, ‡</sup>, Dae-Yong Kim<sup>1, ‡</sup>

#### Contents:

Expanded Methods

Figure S1–S12

Table S1–S11

Supplemental Discussion

## 1 **Methods**

### 2 **Mice**

3 *Txnip*<sup>-/-</sup> (*Txnip* KO) and their littermate control *Txnip*<sup>+/+</sup> (WT) mice (C57BL6/J background)  
4 were obtained from the Korea Research Institute of Bioscience and Biotechnology.<sup>55</sup> For the  
5 bone marrow transplantation experiment, recipient C57BL6/J WT mice were obtained from the  
6 Central Lab. Animal, Inc. (Seoul, Korea). *Tagln*-cre mice (B6.Cg-Tg(*Tagln*-cre)1Her/J, strain  
7 no. 017491) and *Txnip*<sup>flox/flox</sup> mice (B6;129-*Txnip*<sup>tm1Rlee</sup>/J, strain no. 016847) were obtained  
8 from the Jackson Laboratory (Bar harbor, ME, USA). To generate SMC-specific ablation of  
9 *Txnip* by Cre-mediated recombination under *Tagln* promoter, *Tagln*-Cre mice, and *Txnip*<sup>flox/flox</sup>  
10 mice were bred to give *Tagln*-Cre; *Txnip*<sup>flox/flox</sup> mice (SMC<sup>KO</sup>). Their littermates that did not  
11 have *Tagln*-Cre were used as the control group (SMC<sup>WT</sup>). For primary VSMC culture  
12 experiments, three to five week old C57BL6/J WT mice were used. Mice were housed at 22-  
13 24 °C with a standard light-dark cycle (12:12) and chow diet, and were freely accessible to diet  
14 and water. Atherosclerosis was induced by a single injection of adeno-associated virus serotype  
15 8 (AAV8) encoding mPCSK9 (rAAV8/D377Y-mPCSK9), followed by 16 weeks of HFD  
16 (Research Diet, cat. D12079B). At the time point of the AAV injection, WT and *Txnip* KO mice  
17 and SMC<sup>WT</sup> & SMC<sup>KO</sup> mice were 8–10 weeks old, and the mice in the bone marrow  
18 transplantation experiment were 14–16 weeks in age due to recovery periods. Per mice, 1.0 ×  
19 10<sup>11</sup> viral genome (vg) titer of AAV in 200 µl sterile PBS were injected via intraperitoneal  
20 injection. A previous study reported that upon AAV8-PCSK9 injection, female mice showed  
21 impaired liver *PCSK9* transduction with insufficient hypercholesterolemia.<sup>56</sup> In addition, to  
22 exclude possible hormonal effects (e.g., estrogen), we used only male mice in all the  
23 experiments. Mice were randomly distributed to each group. According to the exclusion criteria  
24 established prior to the experiment, mice with a total serum cholesterol of less than 500mg/dl  
25 after 16 weeks of HFD were excluded from the analysis.

### 26 **Bone marrow transplantation**

27 Bone marrow (BM) cells were collected from the femur, tibia, and humerus of WT or *Txnip*  
28 KO mice by flushing RPMI media (supplemented with 10% FBS) into the medullary cavity  
29 using a 23G needle under sterile condition. The collected BM cells were sequentially washed  
30 with serum-free RPMI and PBS through centrifugation (300 g, 7 min) and resuspension.  
31 Approximately 5.0–5.3 × 10<sup>6</sup> BM cells from WT or *Txnip* KO mice were injected intravenously  
32 via retro-orbital route into lethally irradiated (500 rad twice, 3 h interval) WT mice.

1 Subsequently, the mice were fed water containing antibiotics (7.6% enrofloxacin) and  
2 monitored for six weeks, until the transplanted BM was effectively reconstructed. The  
3 transplantation of BM cells was verified by blood PCR. Sequence of the primer pairs, amplicon  
4 sizes, and PCR cycle information are provided in the Major Resources Table.

### 5 **Necropsy, tissue preparations, and histological staining of atherosclerotic lesions**

6 The mice were sacrificed by CO<sub>2</sub> gas inhalation, and blood was obtained through cardiac  
7 puncture to measure the serum total cholesterol, triglycerides, HDL, LDL, and Ca<sup>2+</sup>  
8 concentrations. The mice were perfused with phosphate-buffered saline (PBS) through the  
9 heart to eliminate blood. The hearts and whole aortas were collected. After peri-adventitial  
10 tissue removal, the hearts and aortas were briefly fixed in 10% neutralized formalin for 2 h.  
11 The hearts were molded in optimal cutting temperature (OCT) compounds for cryosectioning  
12 of the aortic sinus. The aortas were opened longitudinally and pinned onto the plate in a “Y”  
13 shape for *en-face* analysis.

14 The cryosections (7 μm) perpendicular to the aortic sinus were made sequentially from the  
15 sinotubular junction (start point; just before the aortic cusps appear) to the point where all the  
16 aortic cusps met (end point). From this, approximately 70–80 serial sections spanning 490–560  
17 μm of the aortic sinus were made. For Oil Red O staining, Oil Red O dye (Sigma-Aldrich, cat.  
18 O0625) were dissolved in isopropanol, and diluted in D.W. (3: 2 ratio) and filtered to make a  
19 working solution. Slides were incubated 5 min with 100% propylene glycol, and stained with  
20 the working solution for 10 min at 60°C. After differentiating the slides by incubating in 85%  
21 propylene glycol for 1 min, the slides were washed with D.W. and mounted with glycerol. For  
22 Alizarin Red staining, Alizarin Red S dye (Sigma-Aldrich, cat. A5533) was dissolved in D.W.  
23 (0.02 g/ml concentration). Slides were incubated with Alizarin Red working solution for 5 min,  
24 and washed sequentially in acetone, acetone-xylene (1:1), xylene solutions by repetitive  
25 dipping (> 20 times), and mounted. Masson’s trichrome staining was performed according to  
26 the general procedure Briefly, slides were rehydrated and fixed in Bouin’s solution for 1 hour  
27 at 56°C. After washing, the slides were then stained with Weigert’s iron hematoxylin working  
28 solution for 10 min. After washing with warm tap water, the slides were stained with Biebrich  
29 scarlet-acid fuchsin solution for 10 min, washed with D.W., and differentiated in  
30 phosphomolybdic-phosphotungstic acid solution for 15 min. The slides were then transferred  
31 directly into aniline blue solution and stained for 10 min. After a brief rinse, the slides were  
32 differentiated in 1% acetic acid for 5 min. The slides were then washed with D.W., dehydrated,

1 and mounted. Alcian Blue staining was performed using Alcian Blue Stain Kit (VECTOR, cat.  
2 H-3501) following manufacture's instructions. Briefly, slides were incubated with acetic acid  
3 solution for 3 min, and tipped off to remove the excess, then incubated with Alcian Blue  
4 Solution for 30 min at RT. After a brief wash (~ 30 sec) with acetic acid solution, the slides  
5 were washed with D.W. and applied by Nuclear Fast Red solution for 5 min. After washing,  
6 the slides were dehydrated and mounted. For quantification of the Oil Red O, Masson's  
7 trichrome and Alican Blue staining, 5 points of regular intervals from the start to the end of the  
8 aortic sinus sections were measured and averaged. MOMA-2, SM22 $\alpha$ , ACAN, and CHAD  
9 proteins were visualized by immunostaining on cryosections. For the HRP detection method  
10 (MOMA-2 and SM22 $\alpha$ ), the sections were pretreated with H<sub>2</sub>O<sub>2</sub> to deplete endogenous  
11 peroxidase. For the fluorescence detection method (ACAN and CHAD), auto fluorescence  
12 signals were quenched using a TrueBlack<sup>®</sup> Lipofuscin Autofluorescence Quencher (Biotium,  
13 cat. 23007) prior to the blocking step. The primary antibodies against anti-MOMA-2 (Abcam,  
14 cat. ab33451; 1:400 dilution), SM22 $\alpha$  (Abcam, cat. ab10135; 1:200 dilution), ACAN  
15 (Proteintech, cat. 13880-1-AP; 1:200 dilution), and CHAD (Atlas Antibodies, cat. HPA018241;  
16 1:200 dilution) were incubated at 4 °C overnight. Anti-rat (VECTOR, cat. MP-7444-15) and  
17 anti-goat (cat. MP-7405) HRP-conjugated secondary antibodies were applied to appropriately  
18 matched primary antibodies. Subsequently, the signals were detected using DAB peroxidase  
19 (VECTOR, cat. SK-4105). Anti-rabbit Alexa 488 fluorescent secondary antibodies (Jackson  
20 ImmunoResearch, cat. 711-545-152; 1:400 dilution) was applied to ACAN and CHAD. The  
21 signals were analyzed using a confocal fluorescence microscope (Zeiss, LSM800). In the case  
22 of MOMA-2 and SM22 $\alpha$  staining, antibody signals were verified by confirming the presence  
23 of positive signals in the appropriate targets (i.e., monocytes/macrophages/foam cells for  
24 MOMA-2 and aortic media for SM22 $\alpha$ ) and the absence of signals in off-targets (e.g.,  
25 cardiomyocytes/aortic media for MOMA-2 and cardiomyocytes for SM22 $\alpha$ ). In addition,  
26 background signals were checked using primary antibody-omitted controls (i.e., secondary  
27 antibody-only). For ACAN and CHAD staining, antibody signals were verified using rabbit  
28 IgG isotype controls (Cell Signaling, cat. CST3900) and secondary antibody-only controls. For  
29 the quantification of immunostaining, three regular interval points from the start to the end of  
30 the aortic sinus sections were measured and averaged. Image J software was used for  
31 quantification of histological stainings.

### 32 **Measurement of the total calcium contents of atherosclerotic aortas**

33 Total calcium contents of the atherosclerotic lesions of WT and *Txnip* KO mice were measured

1 using the QuantiChrom calcium assay kit (BioAssay Systems, Cat. DICA-500) with reference  
2 to the previous method.<sup>57</sup> The regions from the aortic sinus to the aortic arch were decalcified  
3 through overnight incubation in 300  $\mu$ l of 0.6N HCl at 4°C. Next, 5  $\mu$ l of supernatant were  
4 transferred to a 96-well plate and 200  $\mu$ l of the working solution was mixed with reagent A and  
5 B (1:1 ratio) were added. The mixed samples were incubated for 3 min at RT and absorbance  
6 was measured at 612 nm using a microplate reader. The calcium content was normalized to the  
7 tissue dry weight.

## 8 **qRT-PCR**

9 The total RNA was extracted from the mouse aorta, adventitial layer-removed atherosclerotic  
10 lesions, or cultured VSMCs using the Hybrid-R<sup>TM</sup> kit (GeneAll, cat. 305-101), according to the  
11 manufacturer's instructions. Complementary DNA was synthesized from 200–1,000 ng of total  
12 RNA using a QuantiTect Reverse Transcription kit (Qiagen, cat. 205311), and then analyzed  
13 by qPCR using a Rotor-Gene SYBR Green PCR kit (Qiagen, cat. 204074). Sequence of the  
14 qRT-PCR primer pairs, amplicon sizes, and PCR cycle information are provided in the Major  
15 Resources Table.

## 16 **Randomization and blinding in *in vivo* experiments**

17 All randomization processes used in the experiments were performed through the random  
18 number generating method using the RAND() function in Microsoft Excel. In the WT/*Txnip*  
19 KO and SMC<sup>WT</sup>/SMC<sup>KO</sup> experiments, mice of each genotype group were randomly allocated  
20 to cages. In the case of BMT experiment, WT mice were randomly assigned to either BM<sup>WT</sup>  
21 (receiving BM from WT mice) or BM<sup>KO</sup> (receiving BM from *Txnip* KO mice) groups. Mice  
22 cages of each genotype were randomly placed in the animal facility to minimize possible  
23 location-derived nuisance variables. Except for the scRNA-seq experiment, mice were given  
24 random numbers generated by a third person at the time of the sacrifice/sample collection.  
25 Necropsies and sample collections were performed according to the random number order. For  
26 blinding procedure, the random numbers were concealed to a person who conducting the  
27 experiments and/or analysis, which include the lipid measurement, histological quantification,  
28 total calcium measurement, and qRT-PCR experiment, until the final data collection.

## 29 **Preparation of scRNA-seq experiment**

30 For the scRNA-seq experiment, we used the regions from the aortic sinus to the arch, as this  
31 area consists of advanced plaques that are expected to be rich in calcification. To ensure a

1 sufficient cell number and biological reproducibility, four mice were pooled for each WT and  
2 *Txnip* KO genotype. Mice with plasma CHO concentrations higher than 1000 mg/dl at the 8  
3 weeks of atherosclerosis induction were chosen for the scRNA-seq experiment to ensure  
4 adequate induction of advanced atherosclerotic lesions. The cardiac muscles and peri-  
5 adventitial tissues were removed. The aortas were subsequently incubated for 12 min in  
6 enzymatic solutions consisting of PBS with Ca<sup>2+</sup> and Mg<sup>2+</sup> containing 1 mg/ml of collagenase  
7 II (Worthington, cat. CLS-2) and 0.17 mg/ml of elastase (Worthington, cat. LS002279) to  
8 remove the adventitia. After the physical separation of the adventitia, the lumen was opened,  
9 and the aortic valves were removed. The aortic tissues consisting of plaque and media were cut  
10 into 2–5 mm pieces and incubated at 37 °C for 70 min with gentle shaking in a PBS solution  
11 (Ca<sup>2+</sup> and Mg<sup>2+</sup>) containing DNase I (90 U/mL, Sigma-Aldrich, cat. DN25), collagenase I (675  
12 U/mL, cat. C0130), collagenase XI (187.5 U/mL, cat. C7657), hyaluronidase (90 U/mL, cat.  
13 H1115000). The resulting single-cell suspensions were filtered through a 70 µm cell strainer,  
14 stained with propidium iodide (PI), and sorted on a BD FACS Aria III instrument. After  
15 excluding the debris and doublets using forward/side scatter parameters, the PI-negative live  
16 cells were subjected to scRNA-seq experiments.  $1.35 \times 10^5$  and  $1.44 \times 10^5$  live single cells of  
17 WT and *Txnip* KO each were obtained and proceeded to gel bead-in-emulsion (GEMs)  
18 construction.

### 19 **Pre-processing of the scRNA-seq data**

20 Live single cells obtained from the FACS sorting were proceeded to GEM construction to target  
21 a single-cell resolution of 10,000 cells. The cDNA libraries were constructed using the Single  
22 Cell 3' Reagent Kit v3 (10x Genomics) and sequenced on the Illumina<sup>®</sup> system according to  
23 the manufacturer's instructions. The 10X Genomics libraries were de-multiplexed and  
24 quantified using the CellRanger program (ver. 1) following the manufacturer's instructions.  
25 The scRNA-seq data are available in the Sequence Read Archive (SRA) repository under the  
26 accession number SRP346850. The gene expression level of each barcode was calculated using  
27 the “quant” module of CellRanger with GRCh38 and mm10 (ver. 3.1.0). To obtain viable cells,  
28 knee plots were drawn using default CellRanger count. Two knees were detected. First knee  
29 determined 30,445 and 24,349 cells, and the second knee determined 7,186 and 11,852 cells  
30 for WT and *Txnip* KO each. Cells that passed the second knee were proceeded to further  
31 filtration. Cells with high mitochondrial gene UMI counts ( $\geq 30\%$ ) were considered apoptotic  
32 cells and excluded from analysis. Cells with low nFeatures or low total nCounts were removed  
33 by a heuristic method based on their distribution. Through these filtration processes, 622 and

1 590 low-quality cells in WT and *Txnip* KO each were excluded, resulting in 6,564 and 11,262  
2 cells for WT and *Txnip* KO each.

### 3 **Analysis of scRNA-seq data**

4 A total of 17,826 (6,564 for WT and 11,262 for *Txnip* KO) viable cells were preprocessed using  
5 “preprocess\_cds()” and then integrated using “align\_cds()” in the monocle 3 package.<sup>58</sup> The  
6 sample batch corrections were performed using the same function. Statistical test was  
7 performed on the 21,936 commonly expressed genes in both WT and *Txnip* KO with the criteria  
8 of |average log2 fold change| > 0.1 & adjusted p-value < 0.05 to find DEGs between the two  
9 groups. The scRNA-seq data of WT and *Txnip* KO mice were visualized through UMAP.  
10 According to the developer guide of monocle 3, the cluster was divided by cutoff with the  
11 resolution of the default value  $1e^{-4}$ . To estimate the proportions of cells in each cluster, the scale  
12 factor (10,000 cells) was multiplied by each genotype. Cluster specific marker gene was  
13 defined as specificity  $\geq 0.3$  and ordered by marker\_score using “top\_markers()” function in  
14 monocle 3.

15 To integrate the normal VSMCs into WT/*Txnip* KO scRNA-seq data, the scRNA-seq data  
16 of 79 aortic arch (AA) and 64 descending thoracic aorta (DT) cells in normal mice were  
17 collected from GSE117963 of Dobnikar L et al.<sup>28</sup> To integrate the smooth muscle cell lineage  
18 traced atherosclerotic lesional cells into WT/*Txnip* KO scRNA-seq data, scRNA-seq data of  
19 atherosclerotic plaque cells containing ZsGreen1-labeled VSMCs  
20 (*ROSA26<sup>ZsGreen1/+</sup>; Ldlr<sup>-/-</sup>; Myh11-CreER<sup>T2</sup>*) were sourced from GSE155513 of Pan et al.<sup>14</sup> The  
21 datasets consist of 4 time points (0, 8, 16, and 26 weeks of atherosclerosis induction), and all  
22 time points were integrated into our WT and *Txnip* KO scRNA-seq data. The preprocessing of  
23 scRNA-seq was conducted in the same manner as the other datasets. The integrations were  
24 performed using the “align\_cds” function of monocle3 package in R. Among the 24,683 genes  
25 expressed in the WT and *Txnip* KO dataset and 15,549 genes expressed in the Pan et al. dataset,  
26 15,528 commonly expressed genes were analyzed. The top five genes of each cell type was  
27 selected by the “top\_markers” function.

28 For the further analysis of VSMC-derived cells, VSMCs, modulated VSMCs, and  
29 osteochondrogenic clusters were selected and re-aligned using the monocle3 package in R.  
30 Subclustering was performed in the same manner as the previous clustering method. The  
31 comparison of gene expression levels between WT and *Txnip* KO mice was performed using  
32 “FindMarkers” in the Seurat package. DEGs were defined as |average log2 fold change|  $\geq 0.2$

1 and adjusted  $P$  value  $< 0.05$ . The functional enrichment analysis for each gene set was  
2 performed using “enricher()” in the clusterProfiler package with the KEGG pathway database.  
3 The significantly associated function of each gene set was defined as a  $q$ -value  $< 0.2$ . To  
4 estimate the activity of Smad1 and Smad4 regulons (defined as transcription factor-target  
5 relationship), we used the DoRoTheA program from a previous study and followed the  
6 instructions.<sup>40</sup> According to the study, candidate target genes for a specific transcription factor  
7 are assigned ranging from highest confidence level (A) to lowest level (E), based on the  
8 integrated information from manual curation repositories, ChIP-seq data, computational  
9 prediction of TF binding on gene promoters, and/or predicted from large gene expression data  
10 sets. The confidence levels A, B, and C target genes were only included in our analyzed regulon  
11 (Table S9). To estimate the activity of Wnt/ $\beta$ -catenin regulons, gene sets consisting of Wnt/ $\beta$ -  
12 catenin targets were collected from previous studies and are described in Table S10.

### 13 **In situ hybridization**

14 In situ hybridizations were performed on paraffin-embedded mice aortic sinus tissues or human  
15 endarterectomized atheroma samples using RNAscope® 2.5HD Duplex Assay (Advanced Cell  
16 Diagnostics, cat. 322435). This assay enables co-detections of two different transcripts using  
17 C1 (green signal) and C2 (red signal) channels. Probes for mouse *Ly6a* (RNAscope® Probe-  
18 Mm-Ly6a-C2; cat. 427571-C2), *Myh11* (Probe-Mm-Myh11; cat. 316101), *Ibsp* (Probe-Mm-  
19 Ibsp-C2; cat. 414401-C2), and *Acan* (Probe-Mm-Acan; cat. 439101) were used. The  
20 experiments were conducted according to the manufacturer’s instructions. Briefly, sections  
21 were deparaffinized, treated with  $H_2O_2$ , and proceeded to RNAscope® target retrieval  
22 procedure and protease treatment. After incubation of the probes, AMPs (amplifiers) 1-6 were  
23 sequentially incubated, and C2 signals (red) were detected. Then AMP 7-10 were sequentially  
24 incubated and C1 signals (green) were detected. Counterstains were performed using  
25 hematoxylin. *Polr2a* & *Ppib* (constitutively expressed genes of mouse, RNAscope® 2.5HD  
26 Duplex Positive Control Probe (Mm) PPIB-C1/POLR2A-C2 cat. 321651) and *DapB*  
27 (constitutively expressed genes of *E. coli*, Negative Control Probe-DapB, cat. 310043) were  
28 used as positive and negative control probes, respectively. Three points of regular intervals  
29 from the start to the end of the aortic sinus sections were measured and averaged for  
30 quantification. In human sections, probes for *IBSP* (Probe-Hs-IBSP; cat. 587221) and *HAPLN1*  
31 (Probe-Hs-HAPLN1; cat. 506171) were used. As only C1 channel was used, amplification  
32 steps using AMP 4-7 were omitted according to the manufacturer’s guide. *PPIB* (Probe-Hs-  
33 PPIB; cat. 313901) was used as positive control probes for human sections.



## 1 **Sequential staining and merging of Alizarin Red staining and Alcian Blue staining on** 2 **same paraffin sections.**

3 For analyzing spatial relationship between calcified area and cartilage metaplasia area in  
4 atherosclerotic lesions, sequential staining of Alizarin Red and Alcian Blue were performed on  
5 the same paraffin sections. The slides were first stained with Alizarin Red staining and the  
6 resulting microscopic images were taken. Then the coverslip was removed by incubating the  
7 slides in xylene for > 1 day. The slides then rehydrated by incubating sequentially in ethanol  
8 and D.W., and proceeded to Alcian Blue staining. The Alizarin Red staining was eventually,  
9 near-completely removed during the rehydration step and the acetic acid solution-applying step  
10 of Alcian Blue staining. Microscopic images of Alcian Blue staining were taken. The Alizarin  
11 Red-stained images and Alcian Blue-stained images of the same areas were merged using  
12 Photoshop software (Adobe, ver. 23.4.2). Specifically, Alizarin Red-stained images were  
13 overlaid on Alcian Blue-stained images, and precisely synchronized using the Edit-Transform  
14 function of Photoshop. Then the background of Alizarin Red-stained images were normalized  
15 to white using the Curve function. Next, Alizarin Red-positive red signals were extracted using  
16 the Select-Color Range function, and overlaid on the Alcian Blue-stained images. Lastly, the  
17 extracted red signals were converted to grayish-scale using the Black & White function.

## 18 **Integration of the human and mouse scRNA-seq data**

19 For the integration of human and mouse scRNA-seq data, cells of VSMCs and fibroblast-like  
20 clusters were obtained from scRNA-seq data from a total of 48 patient samples across four  
21 previous studies (GSE155512,<sup>14</sup>  $n = 3$ , 3,117 cells; GSE159677,<sup>23</sup>  $n = 3$ , 9,511 cells;  
22 GSE131780,<sup>29</sup>  $n = 4$ , 4,465 cells; Slenders et al,<sup>35</sup>  $n = 38$ , 43,290 cells) and then integrated  
23 them with 13,596 cells of VSMC, modulated VSMC, osteochondrogenic, and fibroblast-like  
24 clusters of WT mice. The preprocessing of scRNA-seq was conducted in the same manner as  
25 the other datasets. The integrations were performed using the “align\_cds” function of monocle3  
26 package in R. In this case, only human and mouse homologous genes were used (the  
27 homologous genes were previously defined according to 'Mouse/Human Orthology with  
28 Phenotype Annotations' of the Jackson Laboratory, <http://www.informatics.jax.org>).

## 29 **Analysis of human scRNA-seq data GSE159766**

30 The scRNA-seq data GSE159677 consisted of type VII calcified atherosclerotic plaque cores  
31 matched with the adjacent proximal regions of three human patients.<sup>23</sup> Downsampling was  
32 performed to reduce data bias due to differences in the cell number (# cells per sample = 2,500).

1 The *MYH11* and *ACTA2* positive cluster cells (VSMCs) were collected from GSE159677. The  
2 selected VSMCs were processed by the same procedure in the mouse data. Four subclusters  
3 (VSMCs, modulated VSMCs, osteochondrogenic, and fibroblast-like) were characterized by  
4 the markers in the mouse scRNA-seq data.

### 5 **Immunostaining of human atherosclerotic lesion samples**

6 Endarterectomized atherosclerotic plaque tissues from the carotid artery region, which  
7 harbored calcification were obtained from patients. The tissue samples were fixed in 10%  
8 neutral buffered formalin, processed in a routine procedure, and embedded in paraffin. Serial  
9 sections (3  $\mu$ m) were obtained and subjected to either hematoxylin & eosin staining or  
10 immunostaining. For the immunostaining of TXNIP and  $\alpha$ -SMA, antigen retrieval was  
11 performed using a Tris-EDTA buffer (pH 9.0; Abcam, cat. ab93864). Endogenous peroxidase  
12 was depleted by incubation with H<sub>2</sub>O<sub>2</sub>. TXNIP (Abcam, cat. ab188865; 1:200 dilution;  
13 0.25mg/ml concentration), rabbit monoclonal IgG (Cell signaling, cat. CST3900; 1:2000  
14 dilution; 0.25mg/ml concentration), and  $\alpha$ -SMA (Agilent, cat. M0851; 1:200 dilution) primary  
15 antibodies were incubated overnight at 4 °C. Anti-rabbit (VECTOR, cat. MP-7401), and anti-  
16 mouse (cat. MP-7402) HRP-conjugated secondary antibodies were applied to the appropriate  
17 slides, and the signals were produced through DAB peroxidase (VECTOR, cat. SK-4105). To  
18 quantify the intensity of TXNIP staining, images of two to three  $\times$  400 field were taken in the  
19 medial side (marked by  $\alpha$ -SMA on the serial sections) of the periphery of the calcified area or  
20 non-calcified area. The staining intensity was evaluated using the ImageJ software (ver. 1.53e,  
21 NIH).

### 22 **Primary VSMC culture experiment**

23 The pooled VSMCs from two to three WT mice constituted one biological replicate. Aortas  
24 were obtained from 3 to 5 weeks of WT (C57BL6/J) mice. For adventitia removal, the aortas  
25 were incubated for 12 min in enzymatic solutions consisting of PBS with Ca<sup>2+</sup> and Mg<sup>2+</sup>  
26 containing 1 mg/ml of collagenase II (Worthington, cat. CLS-2) and 0.17 mg/ml of elastase  
27 (cat. LS002279). The endothelium was removed by gentle scraping. The resulting media was  
28 fully digested into single cells by 1 h 30 min to 2 h incubations of the same enzymatic  
29 combination as that used for adventitia removal. The cultured VSMCs were maintained in  
30 DMEM/high glucose supplemented with sodium pyruvate and L-glutamine (GE Healthcare  
31 Hyclone™, cat. SH30243.01) supplemented with 10% fetal bovine serum (FBS), penicillin (50  
32 U/ml), and streptomycin (50  $\mu$ g/mL) in a 5% CO<sub>2</sub> atmosphere at 37 °C. P3 to P4 passaged

1 VSMCs were used for the experiments. *Txnip* siRNA (Bioneer, AccuTarget™ Genome-wide  
2 Predesigned siRNA No. 56338-3), *Smad4* siRNA (Bionics, A10001 Pre-designed siRNAs,  
3 candidate 1), *MAPK14* siRNA (Bionics, A10001 Pre-designed siRNAs, candidate 3), or  
4 negative control siRNA (Bioneer, AccuTarget™ Negative Control siRNA, cat. SN-1012) were  
5 delivered into the cultured VSMCs using Lipofectamine RNAiMAX reagent (Thermo Fisher,  
6 cat. 13778075) to a final concentration of 10 nmol. For osteodifferentiation, the cultured  
7 VSMCs were grown in an “osteogenic cocktail,” consisting of 0.25 mM L-ascorbic acid, 10  
8 mM  $\beta$ -glycerophosphate, and 0.4 mM H<sub>2</sub>O<sub>2</sub> in DMEM/high glucose without sodium pyruvate  
9 and L-glutamine (WELGENE, cat. LM001-03) supplemented with 10% FBS and  
10 penicillin/streptomycin. The medium was changed every 2 or 3 days. Under these conditions,  
11 osteodifferentiation was achieved in approximately 14 days. At the end point, the extent of  
12 osteodifferentiation was visualized by Alizarin Red staining and quantified using the  
13 cetylpyridinium chloride extraction method. 350 mg of cetylpyridinium chloride (Sigma-  
14 Aldrich, C0732) was dissolved in 10 ml D.W. 330  $\mu$ l of a cetylpyridinium chloride solution per  
15 well was added to 48 well plate. After incubation in the dark for 30 min, the absorbance of the  
16 resulting solution was measured at 405 nm. The amount of accumulated Alizarin Red was  
17 calculated by comparing it with a standard curve. BMP2 (R&D Systems, cat. 355-BM), or  
18 K02288 (MedChemExpress, cat. HY-12278) were used at the indicated concentrations and  
19 times.

## 20 **Immunoblotting**

21 The proteins from whole cell lysates were extracted from primary cultured VSMCs using the  
22 Cytobuster™ protein extraction reagent (Millipore, cat. 71009) with a protease inhibitor  
23 cocktail (GenDEPOT, cat. P3100), and a phosphatase inhibitor cocktail (GenDEPOT, cat.  
24 P3200). Concentrations of the extracted proteins were measured using Pierce™ BCA Protein  
25 Assay Kit (Thermo Fisher, cat. 23227). Proteins were denatured using 5X SDS-PAGE loading  
26 buffer (Biosesang, cat. SF2002-110-00). To analyze the cytoplasmic and nuclear fractions of  
27  $\beta$ -catenin and Smad4, the cytoplasmic and nuclear proteins were compartmentalized using the  
28 NE-PER Nuclear and Cytoplasmic Extraction Reagents kit (Thermo, cat. 78833). The proteins  
29 were separated by 10% sodium dodecyl sulfate-polyacrylamide gel electrophoresis (SDS-  
30 PAGE) and transferred to nitrocellulose membranes (Cytiva, Amersham™Protran™ 0.45 $\mu$ m  
31 NC, cat. 10600003). The membranes were blocked with 5% skim milk. Anti-TXNIP (Abcam,  
32 cat. ab188865; 1:500 dilution),  $\beta$ -catenin (Santa Cruz Biotechnology, cat. sc-17791; 1:200  
33 dilution),  $\alpha$ -tubulin (Cell Signaling, cat. CST2144; 1:1000 dilution), Lamin B1 (cat. ab16048;

1 1:1000 dilution), p-Smad1/5/9 (cat. CST13920; 1:500 dilution), Smad1 (cat. CST6944; 1:1000  
2 dilution), Smad4 (cat. sc-7966; 1:200 dilution), Smad5 (cat. sc-101151; 1:200 dilution), Smad6  
3 (cat. sc-25321; 1:200 dilution), Smad7 (cat. sc-365846; 1:100 dilution), p38 (cat. sc-7149;  
4 1:200 dilution), p-p38 (cat. CST4511; 1:500 dilution), Smurf1 (cat. sc-100616, 1:200 dilution),  
5 Smurf2 (cat. CST12024, 1:1000 dilution), BMPR1A (cat. sc-134285, 1:200 dilution), HA-tag  
6 (cat. CST3724, 1:1000 dilution) and GAPDH (cat. sc-365062; 1:500 dilution) primary  
7 antibodies were incubated at 4 °C overnight. For the co-immunoprecipitation experiments,  
8 Smad5 (cat. sc-101151) and Smad7 (cat. sc-25321) antibodies were substituted for rabbit-host  
9 antibody Smad5 (cat. CST12534; 1: 1000 dilution) and Smad7 (Bioss, cat. bs-0566R, 1: 200  
10 dilution) to avoid eluted mouse antibody fragments from anti-HA-tag beads. Subsequently,  
11 anti-mouse or anti-rabbit HRP-linked secondary antibodies (Cell Signaling, cat. CST7076 and  
12 CST7074) were incubated at RT 1hour with the appropriate primary antibody host. The signals  
13 were produced using a chemiluminescent HRP substrate (Merck Millipore, cat. WBKLS0500)  
14 and analyzed using ImageQuant LAS 4000 Mini (GE Healthcare). If necessary, the membranes  
15 were stripped using Restore<sup>TM</sup> Western Blot Stripping Buffer (Thermo Fisher, cat. 21059),  
16 followed by additional blotting.

### 17 **Co-immunoprecipitation**

18 pCMV3 vector containing c-terminal HA-tagged mouse TXNIP cDNA clone (SinoBiological,  
19 cat. MG52103-CY) or control vector (SinoBiological, cat. CV013) were transfected into  
20 primary cultured VSMCs using Lipofectamine LTX with Plus Reagent (Thermo Fisher, cat.  
21 15338030). 2500 ng of plasmid DNA were transfected per one 6 well, or proportionally scaled  
22 up. Co-immunoprecipitation was performed using Pierce<sup>TM</sup> HA-Tag Magnetic IP/Co-IP Kit  
23 (Thermo Fisher, cat. 88838) following manufacturer's instruction. Briefly, cells were lysed  
24 with IP Lysis/Wash Buffer and debris were removed by centrifugation. Resulting cell lysates  
25 were incubated with anti-HA-Tag Magnetic Beads. After a series of washing steps, captured  
26 proteins were eluted by boiling with a non-reducing sample buffer. Then eluted proteins were  
27 reduced by adding DTT and proceeded to immunoblotting.

### 28 **Statistics**

29 Statistical analyses were performed using GraphPad Prism software ver. 7. All the data are  
30 presented as mean  $\pm$  standard deviation. In *in vivo* experiments, the Shapiro-Wilk normality  
31 tests were performed to test whether data follows a Gaussian distribution, except for groups  
32 with small  $n$  ( $n < 6$ ). An unpaired Student's t-test (two-tailed) was applied for parametric data.

1 The Mann–Whitney  $U$ -test (two-tailed) was applied for non-parametric data and the groups  
2 with  $n < 6$ . In *in vitro* experiments, we assumed that the data follows a Gaussian distribution  
3 by relying on the central limit theorem. An unpaired Student’s t-test (two-tailed) was applied  
4 for comparing two groups, and a one-way ANOVA followed by a post hoc analysis specified  
5 by the GraphPad Prism software was applied for comparing more than two groups. The  
6 statistical significance was set at  $P \leq 0.05$ . Representative images were chosen to represent the  
7 mean of quantification for each group. Statistical information including the  $n$  of each group,  
8 the normality test results (if applied), the applied statistical methods and  $P$  values for each  
9 figure are summarized in the Table S11.

#### 10 **Study approval**

11 Human endarterectomized atherosclerotic plaque samples were obtained from patients after the  
12 receipt of written informed consent in accordance with the Declaration of Helsinki. The study  
13 protocol was approved by the Institutional Review Board of Hanyang University Hospital,  
14 Seoul, Korea (IRB number: 2021-11-027-001). All the animal experiments were approved by  
15 the Institutional Animal Care and Use Committee (IACUC) of Seoul National University  
16 (approval numbers: SNU-180612 and 210517).

## 1 Supplemental Figures and Figure Legends

2 **Figure S1**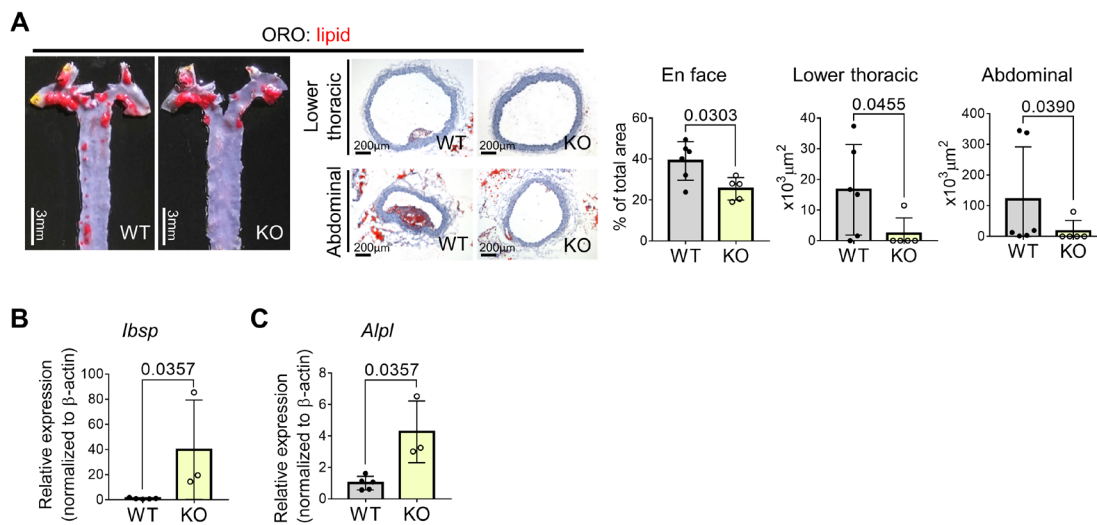

3

4 **Figure S1 (related to Figure 1). Lesions size measurement and qRT-PCR results of bone**  
 5 **marker genes in the aorta of WT and *Txnip* KO mice.** The atherosclerotic burden of aortas  
 6 was analyzed by making *en face* preparation (aortic arch–upper thoracic) and serial  
 7 cryosections (lower thoracic and abdominal) (**A**,  $n = 6/5$ ). The aortas of remaining mice were  
 8 used for qRT-PCR (**B**,  $n = 5/3$ ) (see Figure 1A). **A**, Representative images showing Oil Red O  
 9 (ORO)-stained *en faced* and cryosectioned aorta, and quantification results of the lesion size.  
 10 **B**, qRT-PCR results of *Ibsp* and *Alpl* from the atherosclerotic aortas of WT and *Txnip* KO mice.  
 11 The applied statistical tests and results are summarized in the Table S11. The error bars denote  
 12 standard deviation. The exact *P* values are specified.

1 **Figure S2**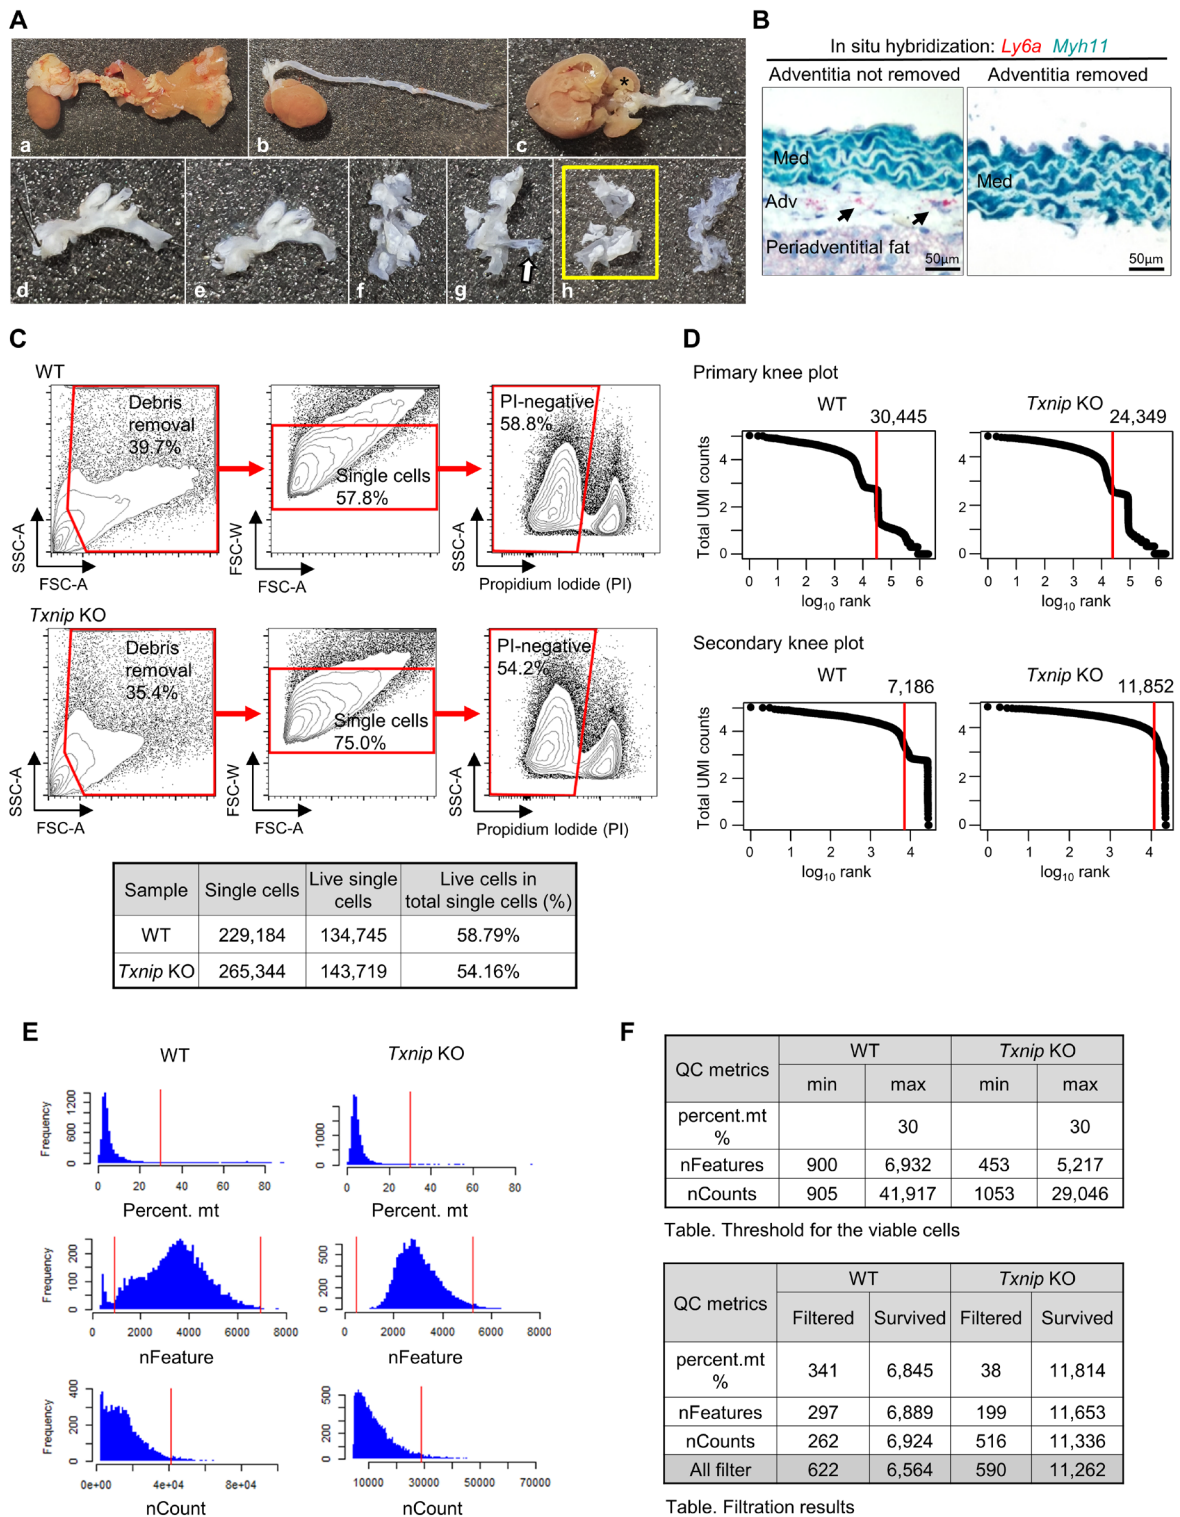

2

3 **Figure S2 (related to Figure 2). Preparation and pre-processing of scRNA-seq**  
 4 **experiments.** A, Representative photographs showing sample preparation procedure. (a)  
 5 Harvesting of the heart and aorta. (b) Periadventitial tissue removal. (c) Opening of the aortic  
 6 sinus and removal of the aortic part below the aortic arch. (d) Removal of the heart tissue,

1 including the aortic valves. (e) Enzymatic digestion for adventitial removal (f) Opening of the  
2 lumen. (g) Stripping of the adventitia. (h) Completion of the adventitial removal. Resulting  
3 adventitia-removed atherosclerotic lesion (marked by yellow box) was used for scRNA-seq  
4 experiment. **B**, Confirmation of adventitial removal using *in situ* hybridization of *Ly6a* (red  
5 signal, marks adventitial *Ly6a*<sup>+</sup> cells) and *Myh11* (green signal, marks medial SMCs). **C**, FACS  
6 plots showing the gating scheme to obtain live single cells using forward scatter (FSC), side  
7 scatter (SSC), and PI-positive cell exclusion. **D**, Knee plots drawn by default CellRanger count  
8 settings. Two knees were called, and cells that passed the second knee proceeded to the next  
9 step. **E** and **F**, Histograms (**E**) and tables (**F**) showing the sample filtration results prior to  
10 dimensional reduction and integration of WT and *Txnip* KO scRNA-seq data. Low-quality cells  
11 were filtered out using nFeature (the number of expressed genes in each cell), nCount (total  
12 UMI counts in each cell), and percentage (percentage of the mitochondrial gene UMI counts)  
13 parameters.



1 **Figure S3**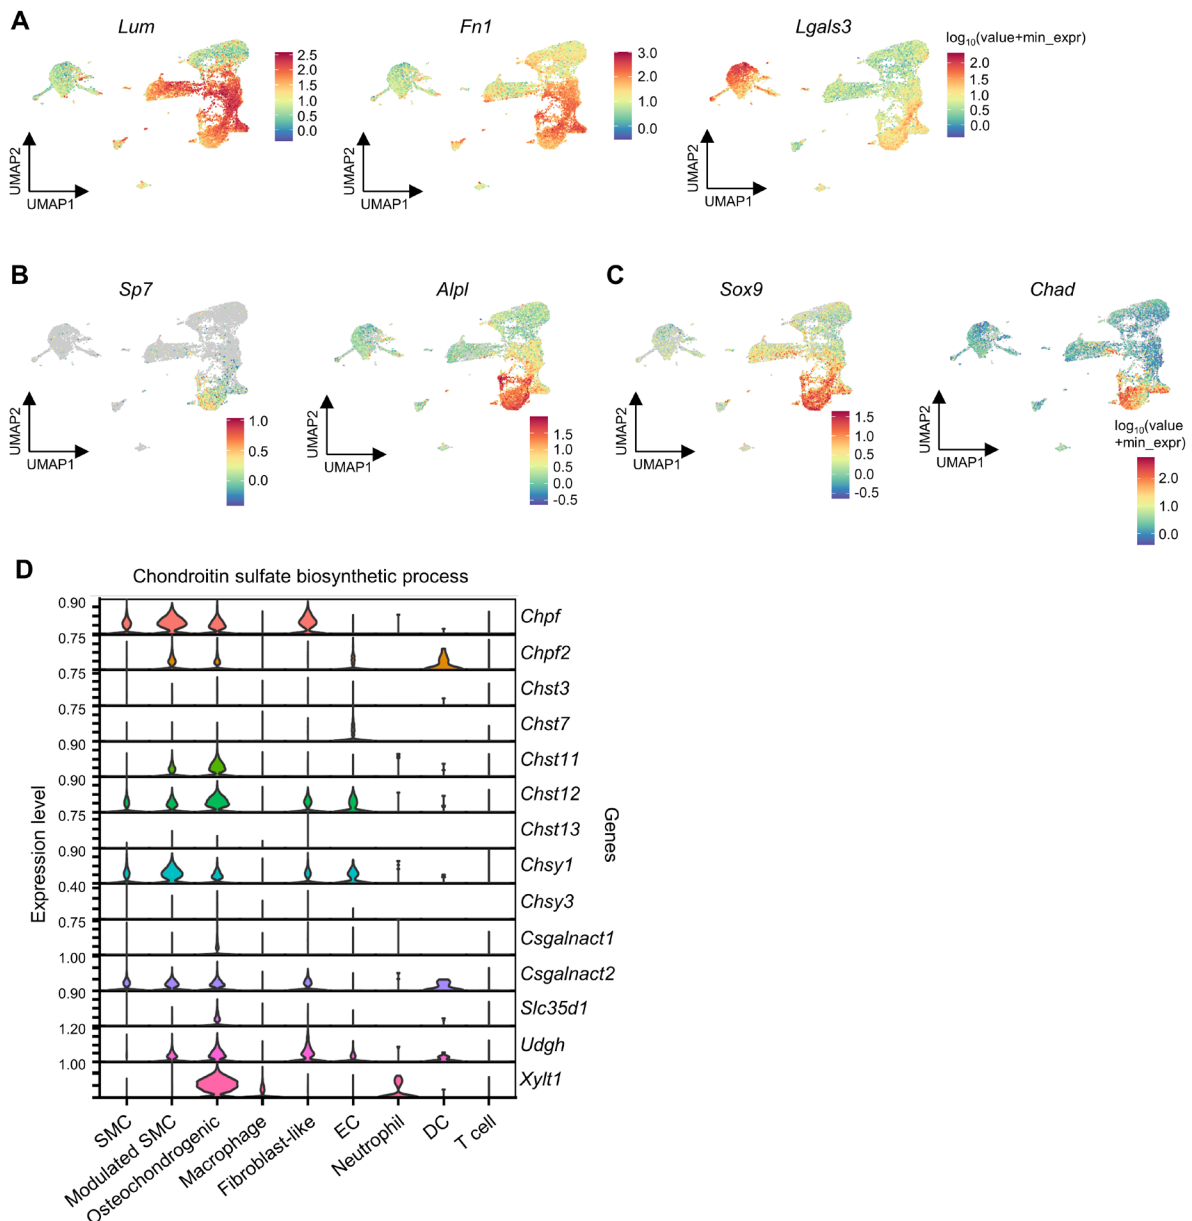

2

3 **Figure S3 (related to Figure 2). Feature plots of additional marker genes for modulated**4 **VSMCs and osteochondrogenic clusters, and expression of the cartilage ECM-related**5 **genes. A, Feature plots of *Lum*, *Fn1*, and *Lgals3*. B and C, Feature plots for additional**6 **osteogenic gene *Sp7* and *Alpl*, and chondrogenic gene *Sox9* and *Chad*. D, Violin plots showing**7 **expressions of chondroitin sulfate biosynthetic process-related genes (GO ID: 0030206).**

1 **Figure S4**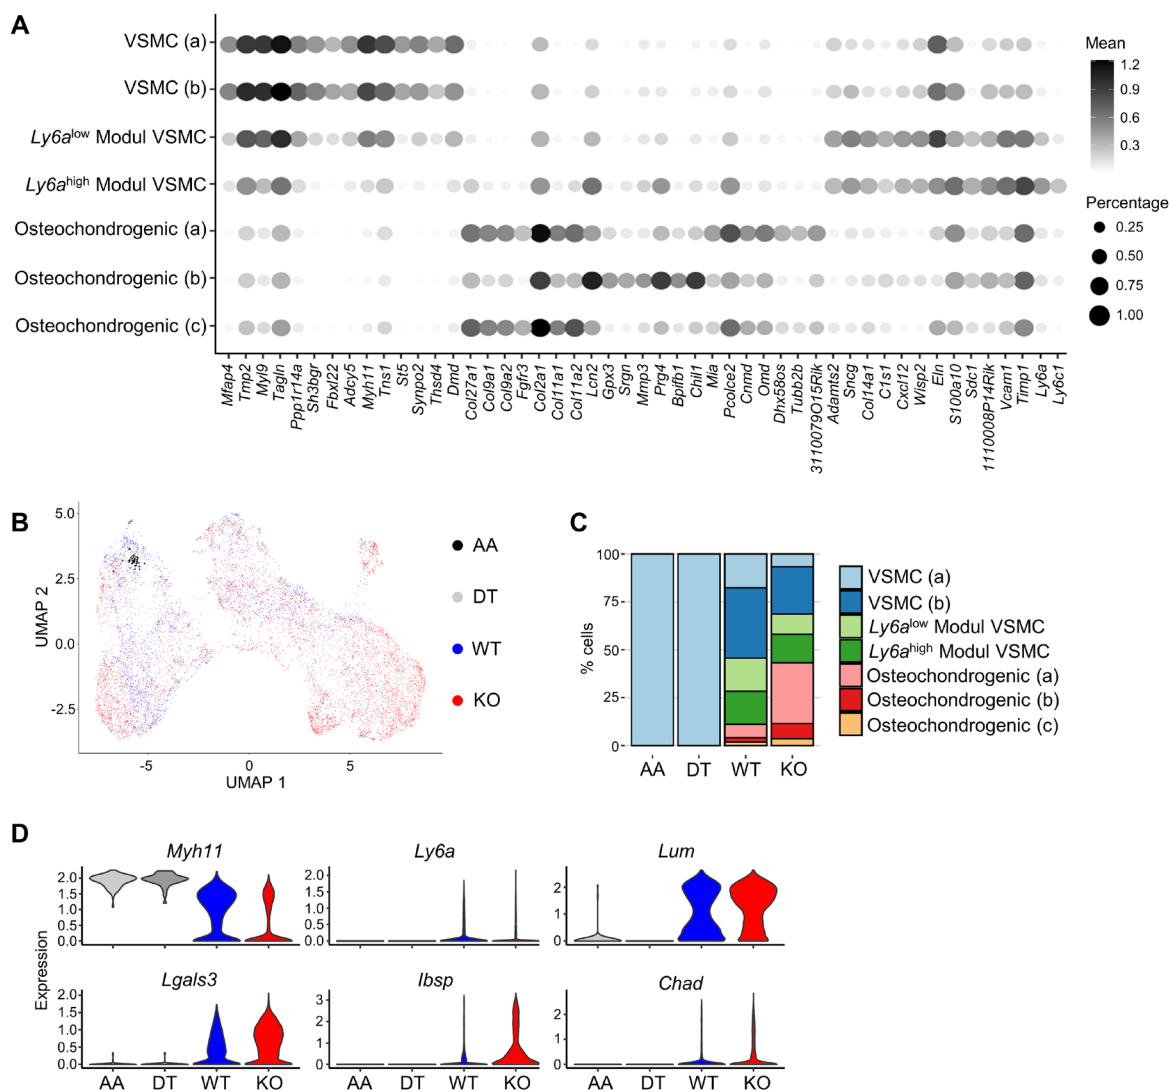

2

3 **Figure S4 (related to Figure 5). Additional data related to analysis of VSMC-derived cell**  
4 **clusters. A**, Heatmap showing the top specific genes for VSMC-derived subclusters. **B–D**,  
5 ScRNA-seq data consisting of the aortic arch (AA) and distal thoracic aorta (DT) from normal  
6 healthy WT mice (GSE1179763)<sup>28</sup> were integrated into WT and *Txnip* KO mice scRNA-seq  
7 data. **B**, UMAP color labeled by the samples. **C**, Cell type fraction rate of the samples. **D**, Violin  
8 plots showing expression of representative marker genes *Myh11* (VSMC cluster), *Ly6a*, *Lum*  
9 (modulated VSMC cluster), *Lgals3* (modulated VSMC~osteochondrogenic cluster), *Ibsp*, and  
10 *Chad* (osteochondrogenic cluster).

1 **Figure S5**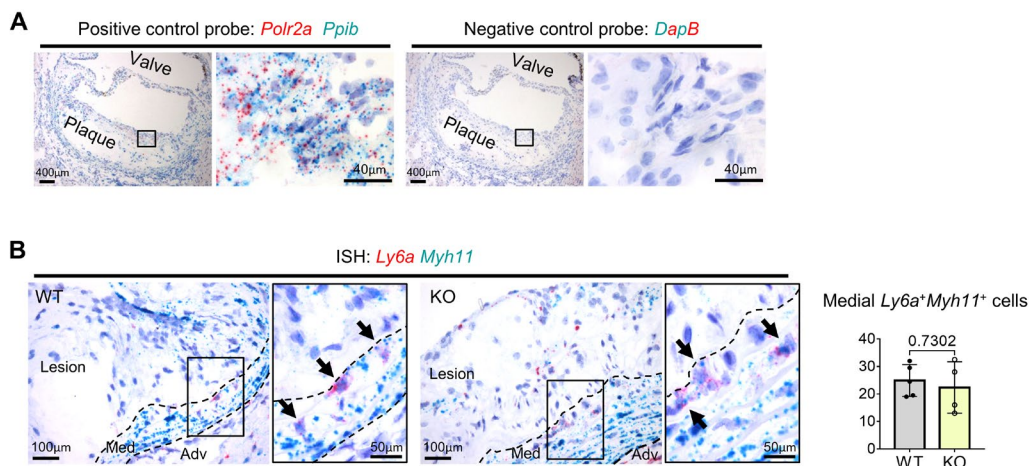

2

3 **Figure S5 (related to Figure 5). Validation of *in situ* hybridization, and localization and**  
 4 **quantification of modulated VSMCs. A,** The *in situ* hybridization experiment was validated  
 5 by probing *Polr2a* and *Ppib* (positive control) and *DapB* (negative control) on WT  
 6 atherosclerotic lesions. **B,** Detection and quantification of medial *Ly6a*<sup>+</sup>*Myh11*<sup>+</sup> cells (marked  
 7 by arrows).  $n = 5/4$  for WT/*Txnip* KO. Med, medial layer. Adv, adventitial layer. Data were  
 8 analyzed using Mann-Whitney *U*-test (two-tailed). The error bars denote standard deviation.  
 9 The exact *P* values are specified.

1 **Figure S6**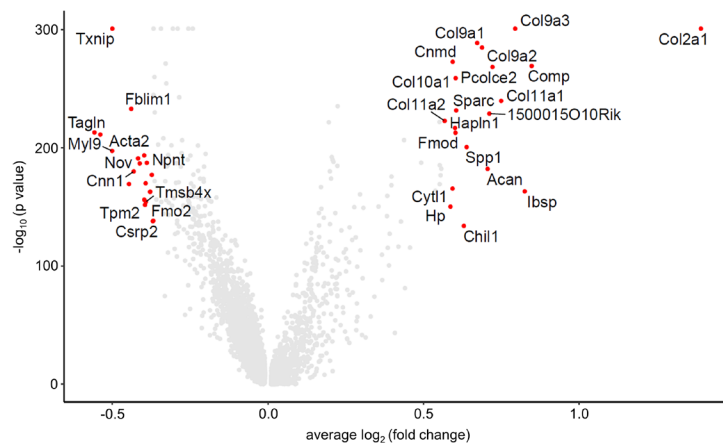

2

3 **Figure S6 (related to Figure 5F). Volcano plot showing DEGs between WT and *Txnip* KO**  
 4 **for the VSMC-derived cell population. VSMCs, modulated VSMCs, and osteochondrogenic**  
 5 **clusters were tied together as VSMC-derived cells. The bone- and cartilage-related genes and**  
 6 **various collagen-producing genes were highly upregulated in the VSMC-derived *Txnip* KO**  
 7 **cells.**

1 **Figure S7**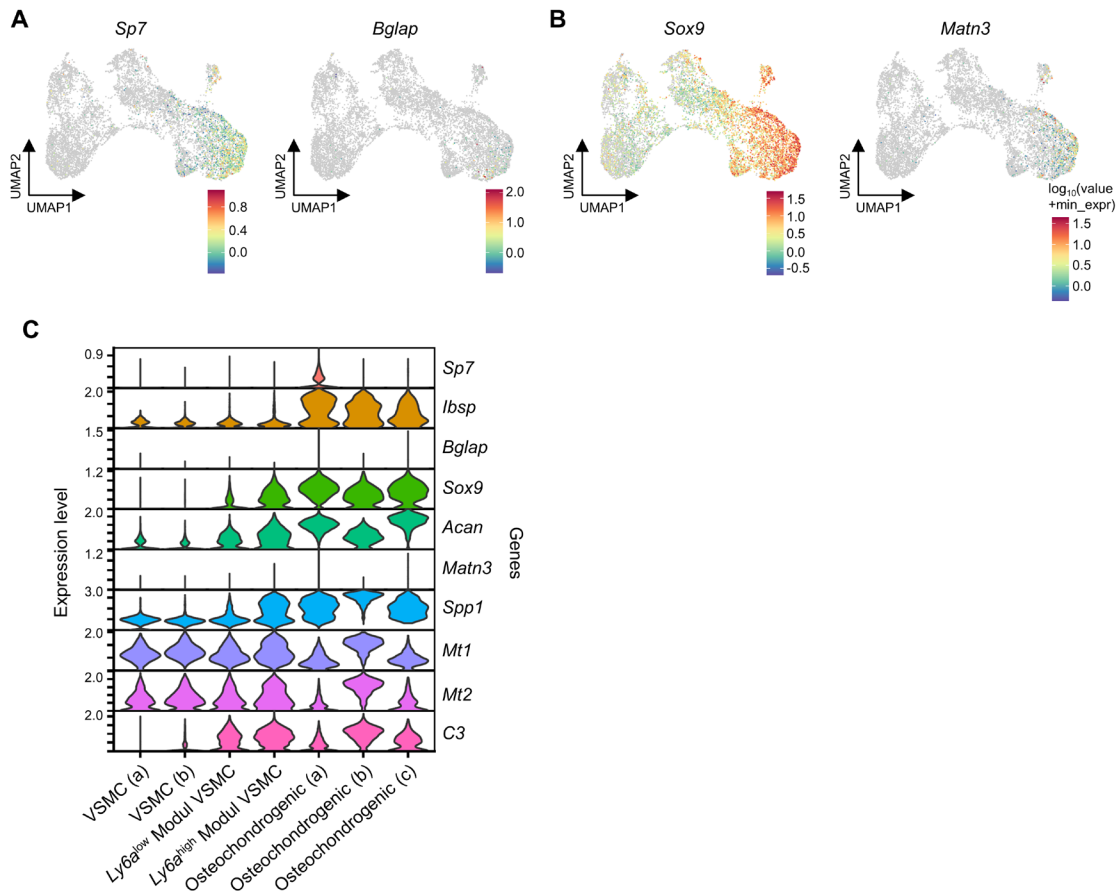

2

3 **Figure S7 (related to Figure 5C and 5G). Expression patterns of additional osteogenic and**  
 4 **chondrogenic markers. A and B, Feature plots for *Sp7*, *Bglap*, *Sox9*, and *Matn3*. C, Violin**  
 5 **plots showing expression patterns of osteogenic genes, chondrogenic genes, metallothionein**  
 6 **genes (*Mt1* and *Mt2*), and *C3* in VSMC-derived clusters.**



1 **Figure S9**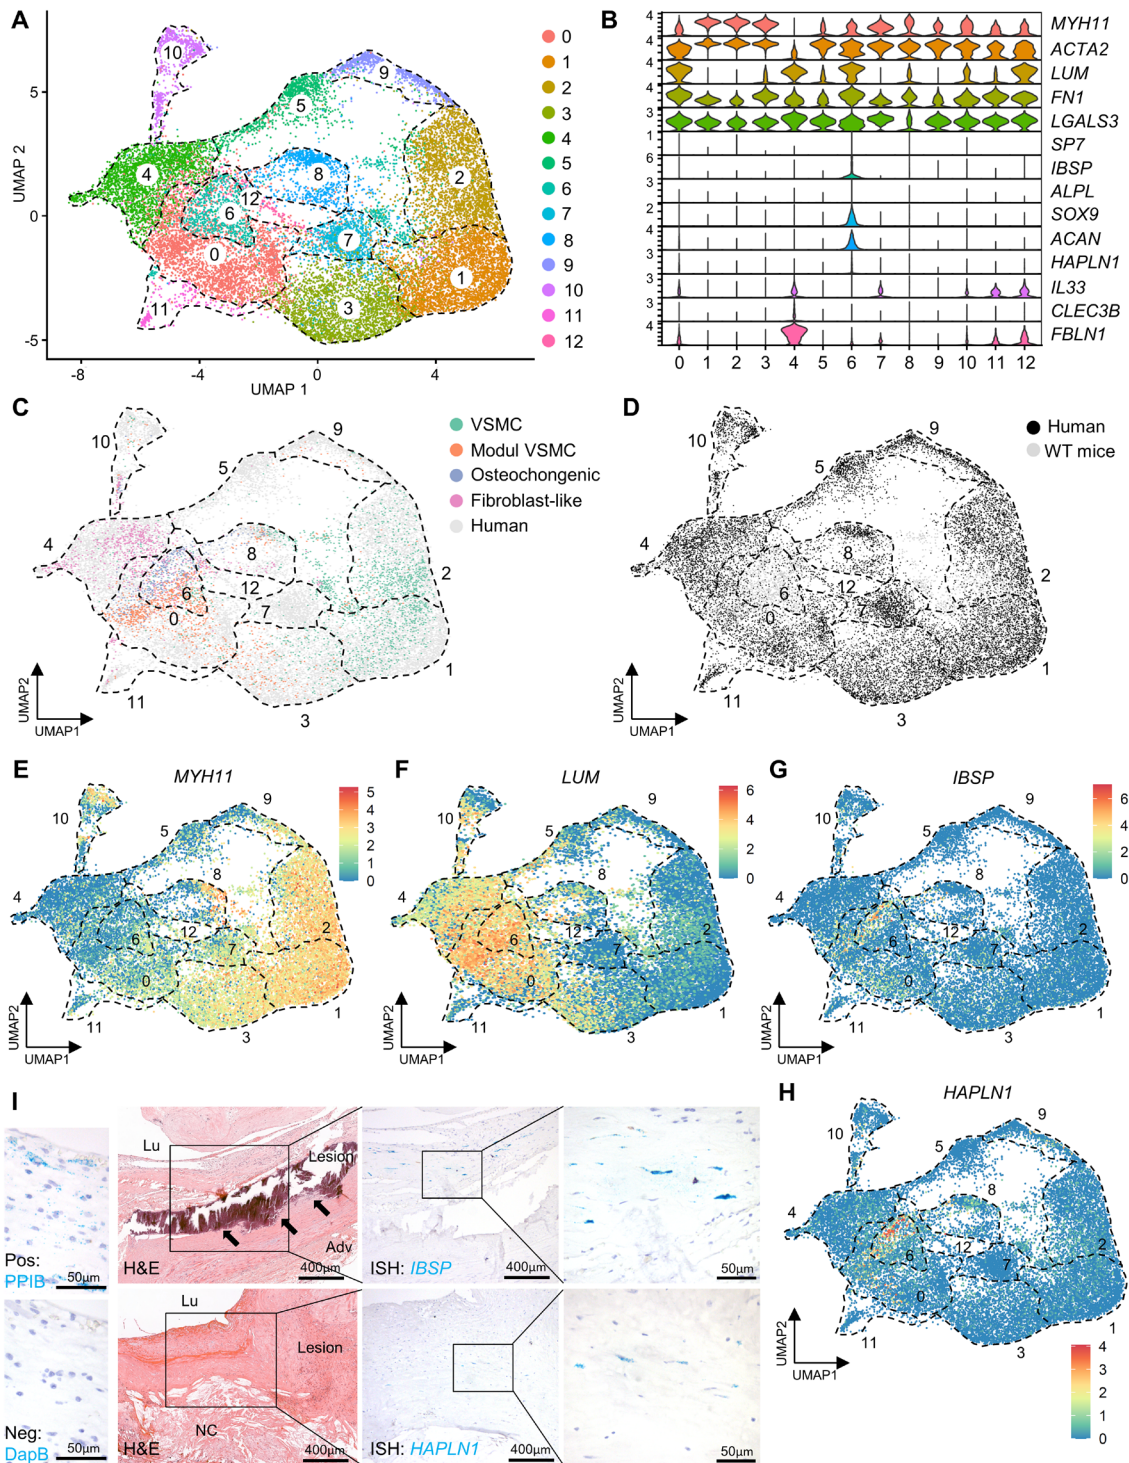

2

3 **Figure S9. Existence of the modulated VSMC and osteochondrogenic population in**  
 4 **human atherosclerotic lesions. A–H, Joint clustering result of human and mouse scRNA-seq**  
 5 **data. VSMCs and fibroblast-like cells were obtained from scRNA-seq data from a total of 48**  
 6 **patient samples across four previous studies (GSE15512,<sup>14</sup>  $n = 3$ ; GSE159677,<sup>23</sup>  $n = 3$ ;**

1 GSE131780,<sup>29</sup>  $n = 4$ ; Slenders et al.,<sup>35</sup>  $n = 38$ ) and integrated them with WT mice cells of  
2 VSMC, modulated VSMC, osteochondrogenic, and fibroblast-like cluster. **B**, Violin plots of  
3 representative marker genes. *MYH11* and *ACTA2*: VSMCs; *LUM*, *FNI* and *LGALS3*:  
4 Modulated VSMCs; *SP7*, *IBSP* and *ALPL*: osteogenic; *SOX9*, *ACAN* and *HAPLN1*:  
5 chondrogenic; *IL33*, *CLEC3B* and *FBLN1*: fibroblast-like. **C** and **D**, UMAP showing WT mice  
6 cell population (**C**) and human cells (**D**). **E–H**, Feature plots for *MYH11*, *LUM*, *IBSP*, and  
7 *HAPLN1*. **I**, *In situ* hybridization result of *IBSP* and *HAPLN1* on human atherosclerosis  
8 samples. Representative images of four samples. Pos, positive control. Neg, negative control.  
9 Lu, lumen. Adv, adventitia. NC, necrotic core. ISH, *in situ* hybridization. Arrows indicate  
10 calcified area.



1 **Figure S10**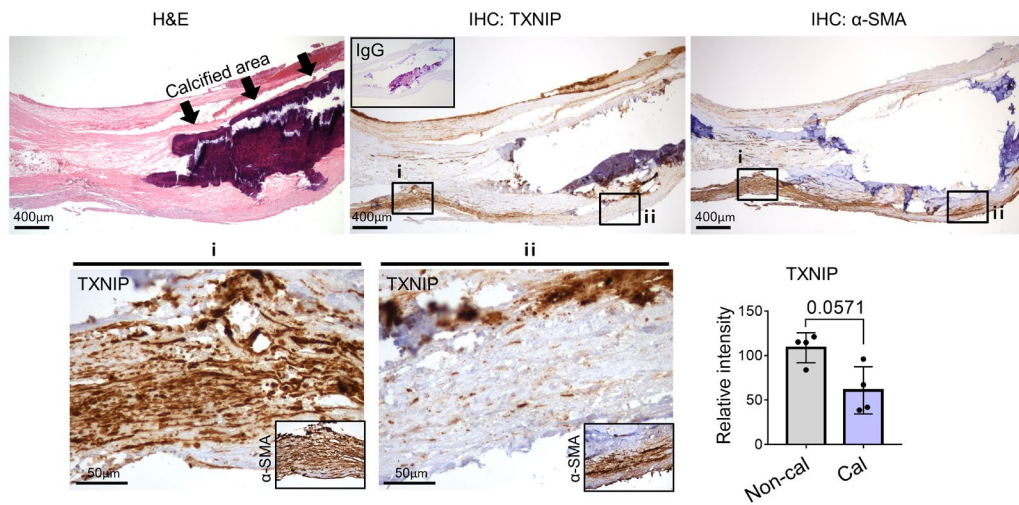

2

3 **Figure S10 (related to Figure 5H). Immunohistochemistry of TXNIP in human**  
 4 **endarterectomized atheroma plaque samples harboring plaque calcification.** Medial side  
 5 was marked by  $\alpha$ -SMA immunostaining on the serial sections. The TXNIP signals between the  
 6 non-calcified and calcified areas were analyzed by Mann-Whitney *U*-test (two-tailed,  $n = 4$ ).  
 7 The exact *P* values are specified.

1 **Figure S11**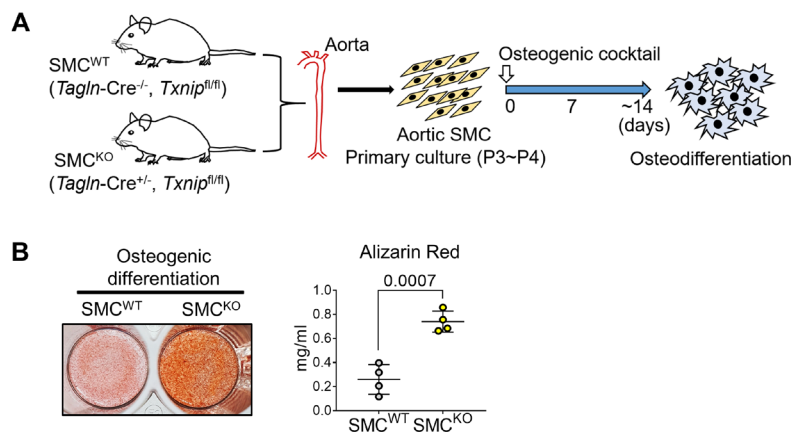

2

3 **Figure S11 (related to Figure 7). Osteodifferentiation result using primary cultured**  
4 **VSMCs from SMC<sup>WT</sup> and SMC<sup>KO</sup>.** **A**, Schematic illustration of the experiment. VSMCs were  
5 primary cultured from littermate control of SMC<sup>WT</sup> and SMC<sup>KO</sup>. The pooled VSMCs from two  
6 to three mice constituted one biological replicate. **B**, Alizarin Red staining results of  
7 osteodifferentiation (end point). The staining was quantified by cetylpyridinium chloride  
8 extraction.  $n = 4$ . The data were analyzed by an unpaired Student's  $t$ -test (two-tailed). The error  
9 bars denote standard deviation. The exact  $P$  values are specified.

1 **Figure S12**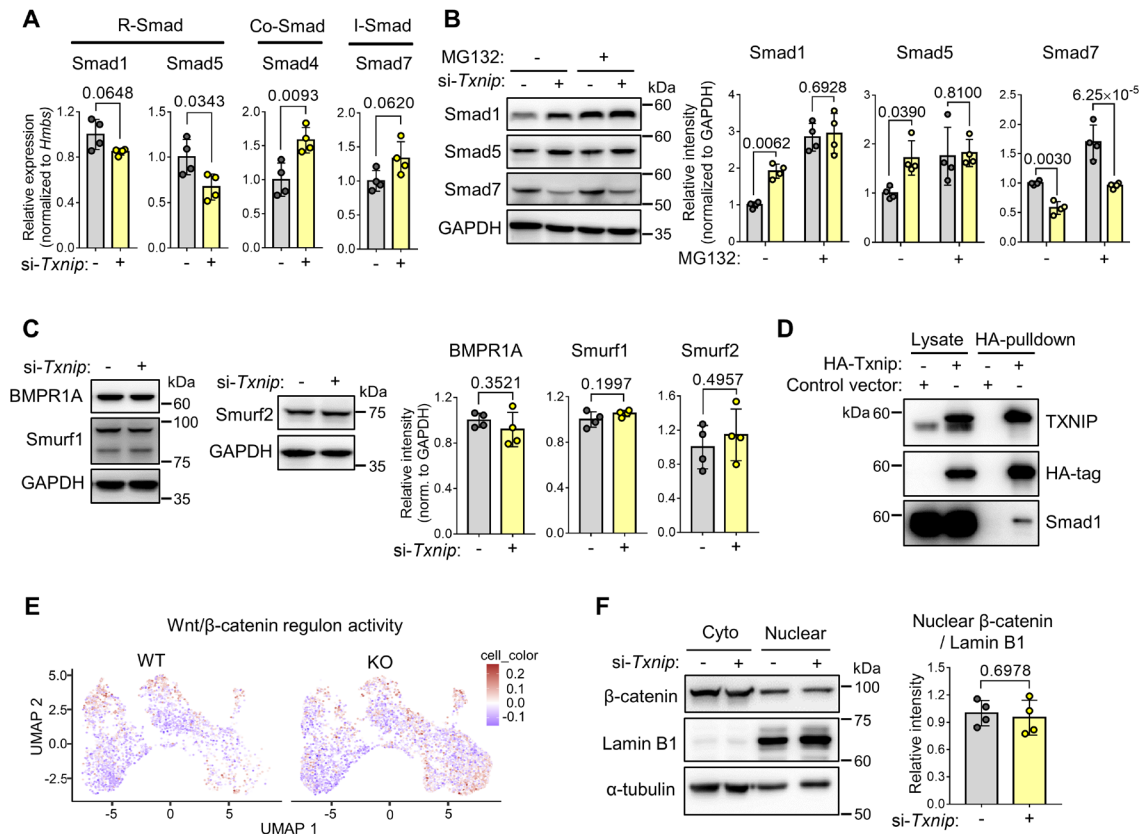

2

3 **Figure S12 (related to Figure 8). Additional experimental data regarding the mechanism**4 **study.** **A**, qRT-PCR results showing mRNA expressions of the Smad molecules which showed5 altered protein level upon TXNIP suppression. *Hmbs* was used as a housekeeping gene.  $n = 4$ .6 **B**, Western blot showing the MG132 treatment result to observe whether the effects of TXNIP

7 suppression on Smad1, Smad5, and Smad7 molecule involve proteasome degradation pathway.

8  $n = 4$ . **C**, Western blot showing no effect of TXNIP suppression on BMPR1A, Smurf1, and9 Smurf2.  $n = 4$ . **D**, Co-immunoprecipitation results. Primary cultured VSMCs were transfected

10 with pCMV3 vector containing HA-tagged TXNIP cDNA clone or control vector. Results from

11 two independent experiments. **E** and **F**, Wnt/ $\beta$ -catenin signaling is not involved in the effect of12 TXNIP on VSMC osteodifferentiation. **E**, Feature plots showing Wnt/ $\beta$ -catenin regulon13 activity in the VSMC-derived cells of WT and *Txnip* KO mice. **F**, Western blot showing14 cytoplasmic and nuclear fractions of  $\beta$ -catenin upon *Txnip* siRNA treatment.  $\alpha$ -tubulin and

15 Lamin B1 were used as the loading controls for the cytoplasmic and nuclear fractions,

16 respectively. The applied statistical tests and results are summarized in the Table S11. The error

17 bars denote standard deviation. The exact  $P$  values are specified.

1 **Supplemental Tables**

2 **Table S1-S8:** Provided as a separate Excel file.

3 **Table S9:** Gene list of the analyzed Smad1 and Smad4 regulons from the DoRoTheA  
4 program.<sup>40</sup> The confidence levels A, B, and C target genes were selected for analysis.

| Transcription factor | Confidence | Target    | Transcription factor | Confidence | Target    |
|----------------------|------------|-----------|----------------------|------------|-----------|
| Smad1                | C          | Cdkn1a    | Smad4                | A          | Ahr       |
| Smad1                | C          | Id2       | Smad4                | A          | Apoc3     |
| Smad1                | C          | Id3       | Smad4                | A          | Bambi     |
| Smad1                | C          | Spp1      | Smad4                | A          | Bglap     |
| Smad1                | C          | Tnfrsf11b | Smad4                | A          | Bglap2    |
| Smad1                | C          | Gdf15     | Smad4                | A          | Bglap3    |
| Smad1                | C          | Zeb2      | Smad4                | A          | Btrc      |
| Smad1                | C          | Arhgef3   | Smad4                | A          | Ccn1      |
| Smad1                | C          | Arid1a    | Smad4                | A          | Cdkn1a    |
| Smad1                | C          | Ctnnb1    | Smad4                | A          | Cdkn2b    |
| Smad1                | C          | Igf2r     | Smad4                | A          | Dach1     |
| Smad1                | C          | Lyn       | Smad4                | A          | Epo       |
| Smad1                | C          | Mrps27    | Smad4                | A          | Fshb      |
| Smad1                | C          | Stk32b    | Smad4                | A          | Fstl3     |
| Smad1                | C          | Tanc1     | Smad4                | A          | Ihh       |
| Smad1                | C          | Xpo7      | Smad4                | A          | Jun       |
| Smad1                | C          | Zfp521    | Smad4                | A          | Met       |
|                      |            |           | Smad4                | A          | Myc       |
|                      |            |           | Smad4                | A          | Nkx2-5    |
|                      |            |           | Smad4                | A          | Por       |
|                      |            |           | Smad4                | A          | Pthlh     |
|                      |            |           | Smad4                | A          | Runx1t1   |
|                      |            |           | Smad4                | A          | Serpine1  |
|                      |            |           | Smad4                | A          | Smad7     |
|                      |            |           | Smad4                | A          | Tgfb1     |
|                      |            |           | Smad4                | A          | Tnc       |
|                      |            |           | Smad4                | A          | Tnfrsf11b |
|                      |            |           | Smad4                | A          | Zfp36     |

5

6 **Table S10:** Gene list of the analyzed Wnt/ $\beta$ -catenin regulon. Among the known target genes of  
7 Wnt/ $\beta$ -catenin signaling (referenced from: <https://web.stanford.edu/group/nusselab/cgi->

1 [bin/wnt/target\\_genes](#)), genes reported as direct targets of Wnt/ $\beta$ -catenin signaling in  
 2 mammalian species were selected.

|              |              |              |                |              |              |                 |              |
|--------------|--------------|--------------|----------------|--------------|--------------|-----------------|--------------|
| <i>Axin2</i> | <i>Ccnd1</i> | <i>Cdc25</i> | <i>Cdx1</i>    | <i>Cldn1</i> | <i>Ctla4</i> | <i>Fgf18</i>    | <i>Fosl1</i> |
| <i>Fst</i>   | <i>Fzd7</i>  | <i>Gbx2</i>  | <i>Gjal</i>    | <i>Id2</i>   | <i>Jun</i>   | <i>Krt1</i>     | <i>Lef1</i>  |
| <i>Lgr5</i>  | <i>Myc</i>   | <i>Mycbp</i> | <i>Neurod1</i> | <i>Nrcam</i> | <i>Ovol1</i> | <i>Pitx2</i>    | <i>Ppard</i> |
| <i>Sp5</i>   | <i>Tbx1</i>  | <i>Tbx3</i>  | <i>Tcf4</i>    | <i>Tcf7</i>  | <i>Tert</i>  | <i>Tnfrsf19</i> | <i>Vcan</i>  |
| <i>Vegfa</i> |              |              |                |              |              |                 |              |

3

4 **Table S11:** The applied statistical methods and results for each figure.

| Figure #    | Group | n  | Shapiro-Wilk<br>normality test<br>P value<br>(if applied) | Applied statistical test(s) and<br>result(s)               |
|-------------|-------|----|-----------------------------------------------------------|------------------------------------------------------------|
| 1B-CHO      | WT    | 11 | 0.8443                                                    | Unpaired Student's <i>t</i> -test, two-tailed,<br>P=0.0001 |
|             | KO    | 8  | 0.2657                                                    |                                                            |
| 1B-TG       | WT    | 11 | 0.7305                                                    | Unpaired Student's <i>t</i> -test, two-tailed,<br>P=0.0002 |
|             | KO    | 8  | 0.4070                                                    |                                                            |
| 1B-HDL      | WT    | 11 | 0.0275                                                    | Mann-Whitney <i>U</i> -test, two-tailed,<br>P=0.3403       |
|             | KO    | 8  | 0.2529                                                    |                                                            |
| 1B-LDL      | WT    | 11 | 0.9707                                                    | Mann-Whitney <i>U</i> -test, two-tailed,<br>P=0.0012       |
|             | KO    | 8  | 0.0051                                                    |                                                            |
| 1C          | WT    | 11 | 0.7647                                                    | Unpaired Student's <i>t</i> -test, two-tailed,<br>P=0.4258 |
|             | KO    | 8  | 0.7468                                                    |                                                            |
| 1D          | WT    | 11 | 0.5482                                                    | Unpaired Student's <i>t</i> -test, two-tailed,<br>P=0.0129 |
|             | KO    | 8  | 0.0846                                                    |                                                            |
| 1E          | WT    | 11 | 0.0082                                                    | Mann-Whitney <i>U</i> -test, two-tailed,<br>P=0.7168       |
|             | KO    | 8  | 0.3586                                                    |                                                            |
| 1F          | WT    | 11 | 0.1367                                                    | Mann-Whitney <i>U</i> -test, two-tailed,<br>P=0.5448       |
|             | KO    | 8  | 0.0165                                                    |                                                            |
| 1G-% lesion | WT    | 11 | 0.0006                                                    | Mann-Whitney <i>U</i> -test, two-tailed,<br>P=0.0409       |
|             | KO    | 8  | 0.1952                                                    |                                                            |
| 1G-Absolute | WT    | 11 | 0.0012                                                    | Mann-Whitney <i>U</i> -test, two-tailed,<br>P=0.0259       |
|             | KO    | 8  | 0.2951                                                    |                                                            |
| 1H          | WT    | 11 | 0.1817                                                    | Unpaired Student's <i>t</i> -test, two-tailed,<br>P=0.0135 |
|             | KO    | 10 | 0.3026                                                    |                                                            |
| 2H          | WT    | 6  | 0.1387                                                    | Unpaired Student's <i>t</i> -test, two-tailed,<br>P=0.0008 |
|             | KO    | 6  | 0.5391                                                    |                                                            |
| 2I          | WT    | 6  | 0.5691                                                    | Unpaired Student's <i>t</i> -test, two-tailed,<br>P=0.0355 |
|             | KO    | 6  | 0.0842                                                    |                                                            |
| 2J-ACAN     | WT    | 6  | 0.5829                                                    | Unpaired Student's <i>t</i> -test, two-tailed,<br>P=0.0154 |
|             | KO    | 6  | 0.6674                                                    |                                                            |
| 2J-CHAD     | WT    | 6  | 0.0002                                                    |                                                            |

|                  |        |    |        |                                                            |
|------------------|--------|----|--------|------------------------------------------------------------|
|                  | KO     | 6  | 0.0049 | Mann-Whitney <i>U</i> -test, two-tailed,<br>P=0.0087       |
| 3C-CHO           | BM WT  | 8  | 0.3195 | Unpaired Student's <i>t</i> -test, two-tailed,<br>P=0.5881 |
|                  | BM KO  | 8  | 0.0628 |                                                            |
| 3C-TG            | BM WT  | 8  | 0.1523 | Unpaired Student's <i>t</i> -test, two-tailed,<br>P=0.8143 |
|                  | BM KO  | 8  | 0.1553 |                                                            |
| 3C-HDL           | BM WT  | 8  | 0.2698 | Unpaired Student's <i>t</i> -test, two-tailed,<br>P=0.3357 |
|                  | BM KO  | 8  | 0.6045 |                                                            |
| 3C-LDL           | BM WT  | 8  | 0.2826 | Unpaired Student's <i>t</i> -test, two-tailed,<br>P=0.0823 |
|                  | BM KO  | 8  | 0.1120 |                                                            |
| 3D               | BM WT  | 8  | 0.2864 | Mann-Whitney <i>U</i> -test, two-tailed,<br>P=0.5737       |
|                  | BM KO  | 8  | 0.0277 |                                                            |
| 3E               | BM WT  | 8  | 0.7140 | Unpaired Student's <i>t</i> -test, two-tailed,<br>P=0.6109 |
|                  | BM KO  | 8  | 0.7934 |                                                            |
| 3F               | BM WT  | 8  | 0.5616 | Unpaired Student's <i>t</i> -test, two-tailed,<br>P=0.2398 |
|                  | BM KO  | 8  | 0.5054 |                                                            |
| 3G-% lesion      | BM WT  | 8  | 0.0000 | Mann-Whitney <i>U</i> -test, two-tailed,<br>P>0.9999       |
|                  | BM KO  | 8  | 0.0007 |                                                            |
| 3G-Absolute      | BM WT  | 8  | 0.0001 | Mann-Whitney <i>U</i> -test, two-tailed,<br>P>0.9999       |
|                  | BM KO  | 8  | 0.0001 |                                                            |
| 3H               | BM WT  | 8  | 0.4348 | Unpaired Student's <i>t</i> -test, two-tailed,<br>P=0.4878 |
|                  | BM KO  | 8  | 0.1895 |                                                            |
| 3I               | BM WT  | 8  | 0.1629 | Unpaired Student's <i>t</i> -test, two-tailed,<br>P=0.6746 |
|                  | BM KO  | 8  | 0.8220 |                                                            |
| 5G-Ibsp & Acan   | WT     | 5  | -      | Mann-Whitney <i>U</i> -test, two-tailed,<br>P=0.0159       |
|                  | KO     | 4  | -      |                                                            |
| 5G-Ibsp          | WT     | 5  | -      | Mann-Whitney <i>U</i> -test, two-tailed,<br>P=0.0159       |
|                  | KO     | 4  | -      |                                                            |
| 5G-Acan          | WT     | 5  | -      | Mann-Whitney <i>U</i> -test, two-tailed,<br>P=0.0635       |
|                  | KO     | 4  | -      |                                                            |
| 6B-Aortic media  | SMC WT | 4  | -      | Mann-Whitney <i>U</i> -test, two-tailed,<br>P=0.0286       |
|                  | SMC KO | 4  | -      |                                                            |
| 6B-Adventitia    | SMC WT | 4  | -      | Mann-Whitney <i>U</i> -test, two-tailed,<br>P=0.0286       |
|                  | SMC KO | 4  | -      |                                                            |
| 6B-Liver         | SMC WT | 4  | -      | Mann-Whitney <i>U</i> -test, two-tailed,<br>P=0.8857       |
|                  | SMC KO | 4  | -      |                                                            |
| 6B-Quadriceps m. | SMC WT | 4  | -      | Mann-Whitney <i>U</i> -test, two-tailed,<br>P=0.8857       |
|                  | SMC KO | 4  | -      |                                                            |
| 6D-CHO           | SMC WT | 12 | 0.2476 | Mann-Whitney <i>U</i> -test, two-tailed,<br>P=0.8667       |
|                  | SMC KO | 15 | 0.0274 |                                                            |
| 6D-TG            | SMC WT | 12 | 0.0244 | Mann-Whitney <i>U</i> -test, two-tailed,<br>P=0.7551       |
|                  | SMC KO | 15 | 0.5968 |                                                            |
| 6D-HDL           | SMC WT | 12 | 0.7902 | Unpaired Student's <i>t</i> -test, two-tailed,<br>P=0.1918 |
|                  | SMC KO | 15 | 0.1796 |                                                            |

|             |              |    |        |                                                                                                                                                     |
|-------------|--------------|----|--------|-----------------------------------------------------------------------------------------------------------------------------------------------------|
| 6D-LDL      | SMC WT       | 12 | 0.2553 | Unpaired Student's <i>t</i> -test, two-tailed,<br>P=0.5385                                                                                          |
|             | SMC KO       | 15 | 0.3810 |                                                                                                                                                     |
| 6E          | SMC WT       | 12 | 0.9960 | Unpaired Student's <i>t</i> -test, two-tailed,<br>P=0.5950                                                                                          |
|             | SMC KO       | 15 | 0.6536 |                                                                                                                                                     |
| 6F          | SMC WT       | 12 | 0.2134 | Unpaired Student's <i>t</i> -test, two-tailed,<br>P=0.2635                                                                                          |
|             | SMC KO       | 15 | 0.0541 |                                                                                                                                                     |
| 6G          | SMC WT       | 12 | 0.4125 | Unpaired Student's <i>t</i> -test, two-tailed,<br>P=0.8936                                                                                          |
|             | SMC KO       | 15 | 0.1057 |                                                                                                                                                     |
| 6H-% lesion | SMC WT       | 12 | 0.0010 | Mann-Whitney <i>U</i> -test, two-tailed,<br>P=0.0289                                                                                                |
|             | SMC KO       | 15 | 0.0006 |                                                                                                                                                     |
| 6H-Absolute | SMC WT       | 12 | 0.0001 | Mann-Whitney <i>U</i> -test, two-tailed,<br>P=0.0542                                                                                                |
|             | SMC KO       | 15 | 0.0002 |                                                                                                                                                     |
| 6I          | SMC WT       | 12 | 0.2185 | Unpaired Student's <i>t</i> -test, two-tailed,<br>P=0.0438                                                                                          |
|             | SMC KO       | 15 | 0.2115 |                                                                                                                                                     |
| 6J          | SMC WT       | 12 | 0.0437 | Mann-Whitney <i>U</i> -test, two-tailed,<br>P=0.0924                                                                                                |
|             | SMC KO       | 15 | 0.1561 |                                                                                                                                                     |
| 7B-Ly6a     | P0           | 4  | -      | One-way ANOVA: P=0.0008<br>Dunnett's multiple comparisons:<br>(1) P0 vs. P1, P=0.0012<br>(2) P0 vs. P2, P=0.0012                                    |
|             | P1           | 4  | -      |                                                                                                                                                     |
|             | P2           | 4  | -      |                                                                                                                                                     |
| 7B-Lum      | P0           | 4  | -      | One-way ANOVA: P=7.00E-06<br>Dunnett's multiple comparisons:<br>(1) P0 vs. P1, P=0.0001<br>(2) P0 vs. P2, P=0.0104                                  |
|             | P1           | 4  | -      |                                                                                                                                                     |
|             | P2           | 4  | -      |                                                                                                                                                     |
| 7B-Myh11    | P0           | 4  | -      | One-way ANOVA: P=1.13E-06<br>Dunnett's multiple comparisons:<br>(1) P0 vs. P1, P=0.0001<br>(2) P0 vs. P2, P=0.0001                                  |
|             | P1           | 4  | -      |                                                                                                                                                     |
|             | P2           | 4  | -      |                                                                                                                                                     |
| 7C          | NC           | 4  | -      | Unpaired Student's <i>t</i> -test, two-tailed,<br>P=3.53E-07                                                                                        |
|             | si-Txnip     | 4  | -      |                                                                                                                                                     |
| 7D          | NC           | 5  | -      | Unpaired Student's <i>t</i> -test, two-tailed,<br>P=0.0007                                                                                          |
|             | si-Txnip     | 5  | -      |                                                                                                                                                     |
| 7E-Sp7      | OD- NC       | 4  | -      | One-way ANOVA: P=3.19E-05<br>Holm-Sidak's multiple comparisons:<br>(1) OD- NC vs. OD- si-Txnip, P=0.8656<br>(2) OD+ NC vs. OD+ si-Txnip, P=4.08E-05 |
|             | OD- si-Txnip | 4  | -      |                                                                                                                                                     |
|             | OD+ NC       | 4  | -      |                                                                                                                                                     |
|             | OD+ si-Txnip | 4  | -      |                                                                                                                                                     |
| 7E-Bglap    | OD- NC       | 4  | -      | One-way ANOVA: P=4.78E-10<br>Sidak's multiple comparisons:<br>(1) OD- NC vs. OD- si-Txnip, P=0.9980<br>(2) OD+ NC vs. OD+ si-Txnip, P=7.81E-10      |
|             | OD- si-Txnip | 4  | -      |                                                                                                                                                     |
|             | OD+ NC       | 4  | -      |                                                                                                                                                     |
|             | OD+ si-Txnip | 4  | -      |                                                                                                                                                     |
| 7E-Ibsp     | OD- NC       | 4  | -      | One-way ANOVA: P=2.50E-07<br>Sidak's multiple comparisons:<br>(1) OD- NC vs. OD- si-Txnip, P=4.77E-07<br>(2) OD+ NC vs. OD+ si-Txnip, P=3.21E-05    |
|             | OD- si-Txnip | 4  | -      |                                                                                                                                                     |
|             | OD+ NC       | 4  | -      |                                                                                                                                                     |
|             | OD+ si-Txnip | 4  | -      |                                                                                                                                                     |
| 7E-Myh11    | OD- NC       | 4  | -      | One-way ANOVA: P=0.0017<br>Sidak's multiple comparisons:                                                                                            |
|             | OD- si-Txnip | 4  | -      |                                                                                                                                                     |

|              |                  |   |   |                                                           |
|--------------|------------------|---|---|-----------------------------------------------------------|
|              | OD+ NC           | 4 | - | (1) OD- NC vs. OD- si-Txnip, P=0.1337                     |
|              | OD+ si-Txnip     | 4 | - | (2) OD+ NC vs. OD+ si-Txnip, P=0.0497                     |
| 7G-Bmp2      | OD- NC           | 4 | - | One-way ANOVA: P=0.0207                                   |
|              | OD- si-Txnip     | 4 | - | Sidak's multiple comparisons:                             |
|              | OD+ NC           | 4 | - | (1) OD- NC vs. OD+ NC, P=0.0476                           |
|              | OD+ si-Txnip     | 4 | - | (2) OD+ NC vs. OD+ si-Txnip, P=0.6841                     |
| 7G-Bmp4      | OD- NC           | 4 | - | One-way ANOVA: P=0.0014                                   |
|              | OD- si-Txnip     | 4 | - | Sidak's multiple comparisons:                             |
|              | OD+ NC           | 4 | - | (1) OD- NC vs. OD+ NC, P=0.0043                           |
|              | OD+ si-Txnip     | 4 | - | (2) OD+ NC vs. OD+ si-Txnip, P=0.8020                     |
| 7H-Id1       | OD- NC           | 4 | - | One-way ANOVA: P=0.0255                                   |
|              | OD- si-Txnip     | 4 | - | Sidak's multiple comparisons:                             |
|              | OD+ NC           | 4 | - | (1) OD- NC vs. OD- si-Txnip, P=0.3888                     |
|              | OD+ si-Txnip     | 4 | - | (2) OD+ NC vs. OD+ si-Txnip, P=0.0127                     |
| 7H-Id2       | OD- NC           | 4 | - | One-way ANOVA: P=3.90E-05                                 |
|              | OD- si-Txnip     | 4 | - | Sidak's multiple comparisons:                             |
|              | OD+ NC           | 4 | - | (1) OD- NC vs. OD- si-Txnip, P=0.9184                     |
|              | OD+ si-Txnip     | 4 | - | (2) OD+ NC vs. OD+ si-Txnip, P=4.19E-05                   |
| 7H-Id3       | OD- NC           | 4 | - | One-way ANOVA: P=0.0049                                   |
|              | OD- si-Txnip     | 4 | - | Sidak's multiple comparisons:                             |
|              | OD+ NC           | 4 | - | (1) OD- NC vs. OD- si-Txnip, P=0.0421                     |
|              | OD+ si-Txnip     | 4 | - | (2) OD+ NC vs. OD+ si-Txnip, P=0.0407                     |
| 7H-Id4       | OD- NC           | 4 | - | One-way ANOVA: P=6.92E-08                                 |
|              | OD- si-Txnip     | 4 | - | Sidak's multiple comparisons:                             |
|              | OD+ NC           | 4 | - | (1) OD- NC vs. OD- si-Txnip, P=0.2401                     |
|              | OD+ si-Txnip     | 4 | - | (2) OD+ NC vs. OD+ si-Txnip, P=6.08E-08                   |
| 8B-Cyto      | NC               | 4 | - | Unpaired Student's <i>t</i> -test, two-tailed, P=0.0002   |
|              | si-Txnip         | 4 | - |                                                           |
| 8B-Nuclear   | NC               | 4 | - | Unpaired Student's <i>t</i> -test, two-tailed, P=0.0027   |
|              | si-Txnip         | 4 | - |                                                           |
| 8F           | K02288- NC       | 4 | - | One-way ANOVA: P=1.09E-10                                 |
|              | K02288- si-Txnip | 4 | - | Sidak's multiple comparisons:                             |
|              | K02288+ NC       | 4 | - | (1) K02288- NC vs. K02288- si-Txnip, P=3.70E-10           |
|              | K02288+ si-Txnip | 4 | - | (2) K02288+ NC vs. K02288+ si-Txnip, P=0.9998             |
|              |                  |   |   | (3) K02288- si-Txnip vs. K02288+ si-Txnip, P=2.47E-10     |
| 8G-si-Smad4  | NC               | 4 | - | Unpaired Student's <i>t</i> -test, two-tailed, P=2.85E-05 |
|              | si-Smad4         | 4 | - |                                                           |
| 8G-si-MAPK14 | NC               | 4 | - | Unpaired Student's <i>t</i> -test, two-tailed, P=0.0007   |
|              | si-MAPK14        | 4 | - |                                                           |



|                   |                                |   |   |                                                                                                                                                                                                                                                                                                                                                                                                           |
|-------------------|--------------------------------|---|---|-----------------------------------------------------------------------------------------------------------------------------------------------------------------------------------------------------------------------------------------------------------------------------------------------------------------------------------------------------------------------------------------------------------|
| 8I                | si-Txnip-/si-Smad4-/si-MAPK14- | 4 | - | One-way ANOVA: P=2E-15<br>Holm-Sidak's multiple comparison:<br>(1) si-Txnip-/si-Smad4-/si-MAPK14- vs. si-Txnip+/si-Smad4-/si-MAPK14-, P=1.88E-13<br>(2) si-Txnip-/si-Smad4-/si-MAPK14- vs. si-Txnip+/si-Smad4+/si-MAPK14-, P=0.5608<br>(3) si-Txnip-/si-Smad4-/si-MAPK14- vs. si-Txnip+/si-Smad4-/si-MAPK14+, P=0.1138<br>(4) si-Txnip-/si-Smad4-/si-MAPK14- vs. si-Txnip+/si-Smad4+/si-MAPK14+, P=0.4045 |
|                   | si-Txnip+/si-Smad4-/si-MAPK14- | 4 | - |                                                                                                                                                                                                                                                                                                                                                                                                           |
|                   | si-Txnip-/si-Smad4+/si-MAPK14- | 4 | - |                                                                                                                                                                                                                                                                                                                                                                                                           |
|                   | si-Txnip+/si-Smad4+/si-MAPK14- | 4 | - |                                                                                                                                                                                                                                                                                                                                                                                                           |
|                   | si-Txnip-/si-Smad4-/si-MAPK14+ | 4 | - |                                                                                                                                                                                                                                                                                                                                                                                                           |
|                   | si-Txnip+/si-Smad4-/si-MAPK14+ | 4 | - |                                                                                                                                                                                                                                                                                                                                                                                                           |
|                   | si-Txnip-/si-Smad4+/si-MAPK14+ | 4 | - |                                                                                                                                                                                                                                                                                                                                                                                                           |
|                   | si-Txnip+/si-Smad4+/si-MAPK14+ | 4 | - |                                                                                                                                                                                                                                                                                                                                                                                                           |
| S1-En face        | WT                             | 6 | - | Mann-Whitney <i>U</i> -test, two-tailed, P=0.0303                                                                                                                                                                                                                                                                                                                                                         |
|                   | KO                             | 5 | - |                                                                                                                                                                                                                                                                                                                                                                                                           |
| S1-Lower thoracic | WT                             | 6 | - | Mann-Whitney <i>U</i> -test, two-tailed, P=0.0455                                                                                                                                                                                                                                                                                                                                                         |
|                   | KO                             | 5 | - |                                                                                                                                                                                                                                                                                                                                                                                                           |
| S1-Abdominal      | WT                             | 6 | - | Mann-Whitney <i>U</i> -test, two-tailed, P=0.0390                                                                                                                                                                                                                                                                                                                                                         |
|                   | KO                             | 5 | - |                                                                                                                                                                                                                                                                                                                                                                                                           |
| S1B               | WT                             | 5 | - | Mann-Whitney <i>U</i> -test, two-tailed, P=0.0357                                                                                                                                                                                                                                                                                                                                                         |
|                   | KO                             | 3 | - |                                                                                                                                                                                                                                                                                                                                                                                                           |
| S1C               | WT                             | 5 | - | Mann-Whitney <i>U</i> -test, two-tailed, P=0.0357                                                                                                                                                                                                                                                                                                                                                         |
|                   | KO                             | 3 | - |                                                                                                                                                                                                                                                                                                                                                                                                           |
| S5B               | WT                             | 5 | - | Mann-Whitney <i>U</i> -test, two-tailed, P=0.7302                                                                                                                                                                                                                                                                                                                                                         |
|                   | KO                             | 4 | - |                                                                                                                                                                                                                                                                                                                                                                                                           |
| S10               | Non-cal                        | 4 | - | Mann-Whitney <i>U</i> -test, two-tailed, P=0.0571                                                                                                                                                                                                                                                                                                                                                         |
|                   | Cal                            |   | - |                                                                                                                                                                                                                                                                                                                                                                                                           |
| S11               | SMC WT                         | 4 | - | Unpaired Student's <i>t</i> -test, two-tailed, P=0.0007                                                                                                                                                                                                                                                                                                                                                   |
|                   | SMC KO                         | 4 | - |                                                                                                                                                                                                                                                                                                                                                                                                           |
| S12A-Smad1        | NC                             | 4 | - | Unpaired Student's <i>t</i> -test, two-tailed, P=0.0648                                                                                                                                                                                                                                                                                                                                                   |
|                   | si-Txnip                       | 4 | - |                                                                                                                                                                                                                                                                                                                                                                                                           |
| S12A-Smad5        | NC                             | 4 | - | Unpaired Student's <i>t</i> -test, two-tailed, P=0.0343                                                                                                                                                                                                                                                                                                                                                   |
|                   | si-Txnip                       | 4 | - |                                                                                                                                                                                                                                                                                                                                                                                                           |
| S12A-Smad4        | NC                             | 4 | - | Unpaired Student's <i>t</i> -test, two-tailed, P=0.0093                                                                                                                                                                                                                                                                                                                                                   |
|                   | si-Txnip                       | 4 | - |                                                                                                                                                                                                                                                                                                                                                                                                           |

|             |                 |   |   |                                                                                                                                                                 |
|-------------|-----------------|---|---|-----------------------------------------------------------------------------------------------------------------------------------------------------------------|
| S12A-Smad7  | NC              | 4 | - | Unpaired Student's <i>t</i> -test, two-tailed,<br>P=0.0620                                                                                                      |
|             | si-Txnip        | 4 | - |                                                                                                                                                                 |
| S12B-Smad1  | MG132- NC       | 4 | - | One-way ANOVA: P=1.34E-05<br>Holm-Sidak's multiple comparisons:<br>(1) MG132- NC vs. MG132- si-Txnip, P=0.0062<br>(2) MG132+ NC vs. MG132+ si-Txnip, P=0.6928   |
|             | MG132- si-Txnip | 4 | - |                                                                                                                                                                 |
|             | MG132+ NC       | 4 | - |                                                                                                                                                                 |
|             | MG132+ si-Txnip | 4 | - |                                                                                                                                                                 |
| S12B-Smad5  | MG132- NC       | 4 | - | One-way ANOVA: P=0.0310<br>Holm-Sidak's multiple comparisons:<br>(1) MG132- NC vs. MG132- si-Txnip, P=0.0390<br>(2) MG132+ NC vs. MG132+ si-Txnip, P=0.8100     |
|             | MG132- si-Txnip | 4 | - |                                                                                                                                                                 |
|             | MG132+ NC       | 4 | - |                                                                                                                                                                 |
|             | MG132+ si-Txnip | 4 | - |                                                                                                                                                                 |
| S12B-Smad7  | MG132- NC       | 4 | - | One-way ANOVA: P=4.31E-06<br>Holm-Sidak's multiple comparisons:<br>(1) MG132- NC vs. MG132- si-Txnip, P=0.0030<br>(2) MG132+ NC vs. MG132+ si-Txnip, P=6.25E-05 |
|             | MG132- si-Txnip | 4 | - |                                                                                                                                                                 |
|             | MG132+ NC       | 4 | - |                                                                                                                                                                 |
|             | MG132+ si-Txnip | 4 | - |                                                                                                                                                                 |
| S12C-BMP1A  | NC              | 4 | - | Unpaired Student's <i>t</i> -test, two-tailed,<br>P=0.3521                                                                                                      |
|             | si-Txnip        | 4 | - |                                                                                                                                                                 |
| S12C-Smurfl | NC              | 4 | - | Unpaired Student's <i>t</i> -test, two-tailed,<br>P=0.1997                                                                                                      |
|             | si-Txnip        | 4 | - |                                                                                                                                                                 |
| S12C-Smurf2 | NC              | 4 | - | Unpaired Student's <i>t</i> -test, two-tailed,<br>P=0.4957                                                                                                      |
|             | si-Txnip        | 4 | - |                                                                                                                                                                 |
| S12F        | NC              | 4 | - | Unpaired Student's <i>t</i> -test, two-tailed,<br>P=0.6978                                                                                                      |
|             | si-Txnip        | 4 | - |                                                                                                                                                                 |

## 1 Supplemental Discussion

### 2 Significance and limitations of *in vivo* mouse models used in our study

3 In the *in vivo* experiment, we utilized three different mouse models (TXNIP ablation in the  
4 whole genome, hematopoietic cells, and SMCs) to analyze the effect of TXNIP on  
5 atherosclerotic calcification through a complementary interpretation of the results. Although  
6 VSMCs are considered to be the major cell type that contribute atherosclerotic calcification,  
7 other cell types, such as macrophages,<sup>30</sup> endothelial cells,<sup>59</sup> and adventitial cells,<sup>60</sup> can also  
8 contribute to atherosclerotic calcification, and the interactions between these various cells can  
9 also shape atherosclerotic phenotypes. Therefore, we initially attempted to characterize the  
10 effect of TXNIP on advanced atherosclerotic lesions in combination with scRNA-seq analysis  
11 using *Txnip* KO (*Txnip*<sup>-/-</sup>) mice. Of note, Byon et al. previously showed a reduced  
12 atherosclerotic burden in *Txnip*<sup>-/-</sup>; *ApoE*<sup>-/-</sup> mice under chow diet condition.<sup>20</sup> However, the  
13 atherosclerotic lesions observed in this study were not considered sufficient for interrogating  
14 the advanced lesion phenotypes, probably due to absence of HFD feeding. By conducting BMT  
15 experiments, we ruled out the possible effects of immune cells on atherosclerotic calcification,  
16 such as macrophage-produced matrix vesicles, nucleating sites, or calcification-facilitating  
17 microenvironments.<sup>7, 30</sup> Lastly, we utilized *Tagln*-Cre; *Txnip*<sup>fllox/fllox</sup> mice to specifically  
18 investigate the role of TXNIP on VSMCs. Of note, *Tagln* can be also partially or transiently  
19 expressed in other cells such as myofibroblasts, and perivascular adipose cells, as well as in  
20 their precursors.<sup>36</sup> In addition, other cell types such as endothelial cells (via endothelial-to-  
21 mesenchymal transition)<sup>61, 62</sup> or adventitial progenitor cells<sup>63, 64</sup> can gain *Tagln* expression and  
22 contribute to atherosclerotic calcification.<sup>59, 60</sup> Therefore, it appears that increased calcification  
23 in our *Tagln*-Cre; *Txnip*<sup>fllox/fllox</sup> mice can not be solely attributable to VSMCs, suggesting a  
24 limitation of the model. We partially complement this limitation by demonstrating augmented  
25 osteodifferentiation in primary cultured VSMCs upon TXNIP suppression. Additional *in vivo*  
26 studies employing inducible Cre (e.g., Cre<sup>ERT2</sup>) could further refine our results.

### 27 Characterization of the osteogenic and chondrogenic populations in mice atheroma

28 In this study, we attempted to further characterize the osteochondrogenic cluster of  
29 atherosclerotic lesions in mice into osteogenic and chondrogenic populations. We found that  
30 *Ibsp*<sup>+</sup>*Acan*<sup>-</sup> cells were enriched in the proximity of the calcified area, suggesting that  
31 atherosclerotic calcification may indeed mimic the normal bone mineralization process by  
32 osteogenic cells. In the cartilage metaplasia area, *Ibsp*<sup>-</sup>*Acan*<sup>+</sup> cells were mainly observed but

1 there were also some *Ibsp<sup>+</sup>Acan<sup>-</sup>* cells, and the ablation of TXNIP increased the proportion of  
2 *Ibsp<sup>+</sup>Acan<sup>-</sup>* cells. Since there were mixed areas of calcification and cartilage metaplasia, we  
3 speculated that *Ibsp<sup>+</sup>Acan<sup>-</sup>* cells of the cartilage metaplasia area may represent cells undergoing  
4 endochondral ossification in the atherosclerotic lesion, as previously suggested,<sup>34</sup> and that this  
5 process might be enhanced in *Txnip* KO mice. Otherwise, the *Ibsp<sup>+</sup>Acan<sup>-</sup>* cells themselves may  
6 indicate dysregulated osteochondrogenic processes in the atherosclerotic lesions. Meanwhile,  
7 the osteochondrogenic cluster in the scRNA-seq data did not clearly separated into osteogenic  
8 and chondrogenic populations (i.e., expressing both osteogenic and chondrogenic markers),  
9 showing the extent of some of the discrepancies between the *in situ* hybridization data. ScRNA-  
10 seq has several technical elements that have to be considered, such as a relatively shallow  
11 sequencing depth, which can cause bias toward highly expressed genes, or the underestimation  
12 of hard-to-isolate cells.<sup>46</sup> Particularly in the latter case, terminally differentiated osteocytes  
13 and/or chondrocytes in atherosclerotic lesions may not be properly captured in the scRNA-seq  
14 data. Further studies will be required to accurately characterize the osteogenic and  
15 chondrogenic cells and their differentiation process in atherosclerotic lesions.

#### 16 **Possible roles of TXNIP in other cell types and cardiovascular diseases**

17 The other remaining questions are as follows. (1) Does the regulatory role of TXNIP in BMP  
18 signaling also works in other cell types? BMP signaling not only plays a central role in bone  
19 morphogenesis, but is also involved in various physiological and embryogenic processes.<sup>65</sup> As  
20 we did not observe any notable skeletal or developmental anomalies in *Txnip* KO mice, the  
21 regulatory effect of TXNIP on BMP signaling is not likely pan-cellular. However, these  
22 possibilities still remain. (2) What is the role of TXNIP in other cardiovascular diseases that  
23 involve the phenotypic modulation of VSMCs (e.g., medial artery calcification, hypertension,  
24 pulmonary arterial hypertension, cerebral microangiopathy, Marfan syndrome)?<sup>66</sup> Further  
25 studies are required to address these questions.
