# Supplementary material for: TXNIP Suppresses the Osteochondrogenic Switch of Vascular Smooth Muscle Cells in Atherosclerosis
Source: PubMed Central journal article supplement — Circ Res. 2022 Dec 1;132(1):52–71. doi: 10.1161/CIRCRESAHA.122.321538 (PMC9829043; doi:10.1161/circresaha.122.321538), 2022-12-01
Supplement: res-132-052-s004.pdf [file res-132-052-s004.pdf]

## Major Resources Table

### Animals (in vivo studies)

| Species | Vendor or Source                         | Background Strain | Sex  | Persistent ID / URL                                                                                                       |
|---------|------------------------------------------|-------------------|------|---------------------------------------------------------------------------------------------------------------------------|
| Mice    | Central Lab. Animal, Inc. (Seoul, Korea) | C57BL/6J          | Male | <a href="https://labanimal.co.kr/product/pdf/C57BL6Jms2013.pdf">https://labanimal.co.kr/product/pdf/C57BL6Jms2013.pdf</a> |

### Genetically Modified Animals

|                                                                                                   | Species | Vendor or Source                                         | Background Strain | Other Information                                                                                                                                 | Persistent ID / URL                                                               |
|---------------------------------------------------------------------------------------------------|---------|----------------------------------------------------------|-------------------|---------------------------------------------------------------------------------------------------------------------------------------------------|-----------------------------------------------------------------------------------|
| <i>Txnip</i> <sup>-/-</sup> (WT)                                                                  | Mice    | Korea Research Institute of Bioscience and Biotechnology | C57BL/6J          | Lee KN et al. VDUP1 is required for the development of natural killer cells. <i>Immunity</i> . 2005;22:195-208. doi: 10.1016/j.immuni.2004.12.012 |                                                                                   |
| <i>Txnip</i> <sup>+/+</sup> ( <i>Txnip</i> KO)                                                    | Mice    | Korea Research Institute of Bioscience and Biotechnology | C57BL/6J          | Lee KN et al. VDUP1 is required for the development of natural killer cells. <i>Immunity</i> . 2005;22:195-208. doi: 10.1016/j.immuni.2004.12.012 |                                                                                   |
| <i>Tagln</i> -Cre (B6.Cg-Tg( <i>Tagln-cre</i> )1Her/J, strain no. 017491)                         | Mice    | Jackson Laboratory                                       | C57BL/6J          |                                                                                                                                                   | <a href="https://www.jax.org/strain/017491">https://www.jax.org/strain/017491</a> |
| <i>Txnip</i> <sup>flox/flox</sup> (B6;129- <i>Txnip</i> <sup>tm1Rlee</sup> /J, strain no. 016847) | Mice    | Jackson Laboratory                                       | C57BL/6J          |                                                                                                                                                   | <a href="https://www.jax.org/strain/016847">https://www.jax.org/strain/016847</a> |

### Antibodies

| Target antigen        | Vendor or Source | Catalog #  | Working concentration |
|-----------------------|------------------|------------|-----------------------|
| TXNIP                 | Abcam            | ab188865   | IHC-P 1:200, WB 1:500 |
| MOMA-2                | Abcam            | ab33451    | IHC-Cryo-DAB 1:400    |
| SM22 $\alpha$         | Abcam            | ab10135    | IHC-Cryo-DAB 1:200    |
| Lamin B1              | Abcam            | ab16048    | WB 1:1000             |
| $\alpha$ -SMA         | Agilent Dako     | M0851      | IHC-P 1:200           |
| Rabbit monoclonal IgG | Cell Signaling   | #3900      | IHC-P 1:2000          |
| CHAD                  | Atlas Antibodies | HPA018241  | IHC-Cryo-F 1:200      |
| $\beta$ -actin        | Cell Signaling   | #4967      | WB 1:1000             |
| RUNX2                 | Cell Signaling   | #12556     | WB 1:500              |
| p-p38                 | Cell Signaling   | #4511      | WB 1:500              |
| p-SMAD1/5/9           | Cell Signaling   | #13820     | WB 1:500              |
| SMAD1                 | Cell Signaling   | #6944      | WB 1:1000             |
| $\alpha$ -tubulin     | Cell Signaling   | CST2144    | WB 1:1000             |
| ACAN                  | Proteintech      | 13880-1-AP | IHC-Cryo-F 1:200      |
| GAPDH                 | Santa Cruz       | sc-365062  | WB 1:500              |
| p38                   | Santa Cruz       | sc-7149    | WB 1:500              |

DOI [to be added]

|                                                     |                |           |                     |
|-----------------------------------------------------|----------------|-----------|---------------------|
| SMAD5                                               | Santa Cruz     | sc-101151 | WB 1:200            |
| SMAD5                                               | Cell Signaling | #12534    | WB 1:1000           |
| SMAD6                                               | Santa Cruz     | sc-25321  | WB 1:200            |
| SMAD7                                               | Santa Cruz     | sc-365846 | WB 1:150            |
| SMAD7                                               | Bioss          | bs-0566R  | WB 1:200            |
| $\beta$ -catenin                                    | Santa Cruz     | sc-133240 | WB 1:200            |
| SMAD4                                               | Santa Cruz     | sc-7966   | WB 1:200            |
| Smurf1                                              | Santa Cruz     | sc-100616 | WB 1:200            |
| Smurf2                                              | Cell Signaling | #12024    | WB 1:1000           |
| BMPRI1A                                             | Santa Cruz     | sc-134285 | WB 1:200            |
| HA-tag                                              | Cell Signaling | #3724     | WB 1:1000           |
| Anti-rabbit HRP-conjugated 2 <sup>nd</sup> antibody | VECTOR         | MP-7401   | IHC-P, ready-to-use |
| Anti-mouse HRP-conjugated 2 <sup>nd</sup> antibody  | VECTOR         | MP-7402   | IHC-P, ready-to-use |
| Anti-rabbit HRP-conjugated 2 <sup>nd</sup> antibody | Cell Signaling | #7074     | WB 1:1000           |
| Anti-mouse HRP-conjugated 2 <sup>nd</sup> antibody  | Cell Signaling | #7076     | WB 1:1000           |

### Cultured Cells

| Name                                         | Vendor or Source                              | Sex (F, M, or unknown) | Persistent ID / URL |
|----------------------------------------------|-----------------------------------------------|------------------------|---------------------|
| Primary vascular smooth muscle cells (VSMCs) | Cultured from 3-5 weeks of WT (C57BL6/J) mice | Male                   |                     |

### Data & Code Availability

| Description                                                                                 | Source / Repository         | Persistent ID / URL |
|---------------------------------------------------------------------------------------------|-----------------------------|---------------------|
| Single-cell RNA-sequencing data of atherosclerotic lesions from WT and <i>Txnip</i> KO mice | Sequence Read Archive (SRA) | SRP346850           |

### Primer pairs, amplicon size, and thermocycle conditions

| Description                                                     | Sequence                                                              | Amplicon size (bp) | Thermocycle conditions                                                              |
|-----------------------------------------------------------------|-----------------------------------------------------------------------|--------------------|-------------------------------------------------------------------------------------|
| Primer pairs for detecting <i>Txnip</i> <sup>+/+</sup> genotype | F: 5'-ATTCCCCTTCCAGGTGGA-3'<br>R: 5'-TTGAAATTGGCTCTGT-3'              | 478                | 95°C 5 min – [95°C 1 min – 58°C 1 min – 72°C 1 min] × 35 cycle – 72°C 10 min        |
| Primer pairs for detecting <i>Txnip</i> <sup>-/-</sup> genotype | F: 5'-GCAAAGACCAGACCGTTCAT-3'<br>R: 5'-GAAGCCAATGAAACCCA-3'           | 593                | 95°C 5 min – [95°C 1 min – 58°C 1 min – 72°C 1 min] × 35 cycle – 72°C 10 min        |
| RT-PCR primer: mouse <i>Alpl</i>                                | F: 5'-CAAGGACATCGCATATCAGCTAA-3'<br>R: 5'-CAGTTCTGTTCTTCGGGTACATGT-3' | 95                 | 95°C 10 min – [95°C 10 sec – 60°C 30 sec] × 45 cycle (combined annealing/extension) |
| RT-PCR primer: mouse <i>Bglap</i>                               | F: 5'-GCAATAAGGTAGTGAACAGACTCC-3'<br>R: 5'-GTTTGTAGGCGGTCTTCAAGC-3'   | 147                | 95°C 10 min – [95°C 10 sec – 60°C 30 sec] × 45 cycle (combined annealing/extension) |
| RT-PCR primer: mouse <i>Bmp2</i>                                | F: 5'-CACACAGGGACACACCAACC-3'<br>R: 5'-CAAAGACCTGCTAATCCTCAC-3'       | 100                | 95°C 10 min – [95°C 10 sec – 61°C 30 sec] × 45 cycle (combined annealing/extension) |

|                                        |                                                                    |     |                                                                                        |
|----------------------------------------|--------------------------------------------------------------------|-----|----------------------------------------------------------------------------------------|
| RT-PCR primer:<br>mouse <i>Bmp4</i>    | F: 5'-GCCGAGCCAACACTGTGAGGA-3'<br>R: 5'-GATGCTGCTGAGGTTGAAGAGG-3'  | 107 | 95°C 10 min – [95°C 10 sec – 63°C 30 sec] × 45 cycle<br>(combined annealing/extension) |
| RT-PCR primer:<br>mouse <i>Hmbs</i>    | F: 5'-AAGGGCTTTTCTGAGGCACC-3'<br>R: 5'-AGTTGCCCATCTTTCATCACTG-3'   | 78  | 95°C 10 min – [95°C 10 sec – 60°C 30 sec] × 45 cycle<br>(combined annealing/extension) |
| RT-PCR primer:<br>mouse <i>Ibsp</i>    | F: 5'-CACCCCAAGCACAGACTTTT-3'<br>R: 5'-TCGTGCTTTCCTTCACTTT-3'      | 97  | 95°C 10 min – [95°C 10 sec – 60°C 30 sec] × 45 cycle<br>(combined annealing/extension) |
| RT-PCR primer:<br>mouse <i>Id1</i>     | F: 5'-CCTAGCTGTTTCGCTGAAGGC-3'<br>R: 5'-GTAGAGCAGGACGTTACCT-3'     | 141 | 95°C 10 min – [95°C 10 sec – 60°C 30 sec] × 45 cycle<br>(combined annealing/extension) |
| RT-PCR primer:<br>mouse <i>Id2</i>     | F: 5'-ATGAAAGCCTTCAGTCCGGTG-3'<br>R: 5'-AGCAGACTCATCGGGTCGT-3'     | 107 | 95°C 10 min – [95°C 10 sec – 60°C 30 sec] × 45 cycle<br>(combined annealing/extension) |
| RT-PCR primer:<br>mouse <i>Id3</i>     | F: 5'-CGACCGAGGAGCCTCTTAG-3'<br>R: 5'-GCAGGATTTCCACCTGGCTA-3'      | 114 | 95°C 10 min – [95°C 10 sec – 60°C 30 sec] × 45 cycle<br>(combined annealing/extension) |
| RT-PCR primer:<br>mouse <i>Id4</i>     | F: 5'-CAGTGCGATATGAACGACTGC-3'<br>R: 5'-GACTTCTTGTGGGCGGGAT-3'     | 72  | 95°C 10 min – [95°C 10 sec – 60°C 30 sec] × 45 cycle<br>(combined annealing/extension) |
| RT-PCR primer:<br>mouse <i>Lum</i>     | F: 5'-CTCTTGCCTTGGCATTAGTCG-3'<br>R: 5'-GGGGCAGTTACATTCTGGTG-3'    | 114 | 95°C 10 min – [95°C 10 sec – 60°C 30 sec] × 45 cycle<br>(combined annealing/extension) |
| RT-PCR primer:<br>mouse <i>Ly6a</i>    | F: 5'-GCTATGGAGTCCCATTGAG-3'<br>R: 5'-AGGAAGTCTTACGTTGACC-3'       | 198 | 95°C 10 min – [95°C 10 sec – 60°C 30 sec] × 45 cycle<br>(combined annealing/extension) |
| RT-PCR primer:<br>mouse <i>Myh11</i>   | F: 5'-CATCCTGACCCACGTATCAA-3'<br>R: 5'-ATCGGAAAAGGCGCTCATAGG-3'    | 119 | 95°C 10 min – [95°C 10 sec – 60°C 30 sec] × 45 cycle<br>(combined annealing/extension) |
| RT-PCR primer:<br>mouse <i>Sp7</i>     | F: 5'-AGAGGTTCACTCGCTCTGACG-3'<br>R: 5'-TTGCTCAAGTGGTCGCTTCTG-3'   | 115 | 95°C 10 min – [95°C 10 sec – 60°C 30 sec] × 45 cycle<br>(combined annealing/extension) |
| RT-PCR primer:<br>mouse <i>Txnip</i>   | F: 5'-CGAGTCAAAGCCGTCAGGAT-3'<br>R: 5'-TTCATAGCGCAAGTAGTCCAAAGT-3' | 102 | 95°C 10 min – [95°C 10 sec – 60°C 30 sec] × 45 cycle<br>(combined annealing/extension) |
| RT-PCR primer:<br>mouse $\beta$ -actin | F: 5'-CGCCACCAGTTCGCCATGGA-3'<br>R: 5'-TACAGCCCGGGAGCATCGT-3'      | 105 | 95°C 10 min – [95°C 10 sec – 64°C 30 sec] × 45 cycle<br>(combined annealing/extension) |

## DNA/cDNA Clones

| Clone Name                                        | Source / Repository             | Persistent ID / URL                                                                                                                                                                             |
|---------------------------------------------------|---------------------------------|-------------------------------------------------------------------------------------------------------------------------------------------------------------------------------------------------|
| pCMV3 C-terminal HA-tagged control vector         | SinoBiological, cat. CV013      | <a href="https://kr.sinobiological.com/cdna-clone/mouse-txnip-mg52103-cy">https://kr.sinobiological.com/cdna-clone/mouse-txnip-mg52103-cy</a>                                                   |
| pCMV3 C-terminal HA-tagged mouse TXNIP cDNA clone | SinoBiological, cat. MG52103-CY | <a href="https://kr.sinobiological.com/cdna-clone/control-vector-pcmv3-c-terminal-ha-tagged-cv013">https://kr.sinobiological.com/cdna-clone/control-vector-pcmv3-c-terminal-ha-tagged-cv013</a> |

## Other

| Description   | Vendor or Source | Catalog |
|---------------|------------------|---------|
| High fat diet | Research Diet    | D12079B |
| Oil Red O dye | Sigma-Aldrich    | O0625   |

DOI [to be added]

|                                                                      |                           |                                                       |
|----------------------------------------------------------------------|---------------------------|-------------------------------------------------------|
| Alizarin Red S dye                                                   | Sigma-Aldrich             | A5533                                                 |
| Alcian Blue Stain Kit                                                | VECTOR                    | H-3501                                                |
| TrueBlack® Lipofuscin Autofluorescence Quencher                      | Biotium                   | 23007                                                 |
| QuantiChrom Calcium assay kit                                        | BioAssay Systems          | DICA-500                                              |
| Hybrid-R™ RNA extraction kit                                         | GeneAll                   | 305-101                                               |
| QuantiTect Reverse Transcription kit                                 | Qiagen                    | 205311                                                |
| Rotor-Gene SYBR Green PCR kit                                        | Qiagen                    | 204074                                                |
| Collagenase II                                                       | Worthington               | CLS-2                                                 |
| Elastase                                                             | Worthington               | LS002279                                              |
| Collagenase I                                                        | Sigma-Aldrich             | C0130                                                 |
| Collagenase XI                                                       | Sigma-Aldrich             | C7657                                                 |
| DNase I                                                              | Sigma-Aldrich             | DN25                                                  |
| Hyaluronidase                                                        | Sigma-Aldrich             | H1115000                                              |
| RNAScope® Probe-Mm-Ly6a                                              | Advanced Cell Diagnostics | 427571-C2                                             |
| RNAScope® Probe-Mm-Myh11                                             | Advanced Cell Diagnostics | 316101                                                |
| RNAScope® Probe-Mm-Ibsp                                              | Advanced Cell Diagnostics | 414401-C2                                             |
| RNAScope® Probe-Mm-Acan                                              | Advanced Cell Diagnostics | 439101                                                |
| RNAScope® 2.5HD Duplex Positive Control Probe (Mm) PPIB-C1/POLR2A-C2 | Advanced Cell Diagnostics | 321651                                                |
| RNAScope® Negative Control Probe-DapB                                | Advanced Cell Diagnostics | 310043                                                |
| RNAScope® Probe-Hs-IBSP                                              | Advanced Cell Diagnostics | 587221                                                |
| RNAScope® Probe-Hs-HAPLN1                                            | Advanced Cell Diagnostics | 506171                                                |
| RNAScope® Probe-Hs-PPIB                                              | Advanced Cell Diagnostics | 313901                                                |
| RNAScope® 2.5HD Duplex Assay                                         | Advanced Cell Diagnostics | 322435                                                |
| Tris-EDTA buffer (pH 9.0)                                            | Abcam                     | Ab93864                                               |
| DAB peroxidase                                                       | VECTOR                    | SK-4105                                               |
| Negative control siRNA                                               | Bioneer                   | AccuTarget™ Negative Control siRNA, cat. SN-1012      |
| <i>Txnip</i> siRNA                                                   | Bioneer                   | AccuTarget™ Genome-wide Predesigned siRNA No. 56338-3 |
| <i>Smad4</i> siRNA                                                   | Bionics                   | A10001 Pre-designed siRNAs, candidate 1               |
| <i>MAPK14</i> siRNA                                                  | Bionics                   | Pre-designed siRNAs, candidate 3                      |
| Lipofectamine RNAiMAX                                                | Thermo Fisher             | 13778075                                              |
| Cytobuster™ protein extraction reagent                               | Millipore                 | 71009                                                 |
| Phosphatase inhibitor cocktail                                       | GenDEPOT                  | P3200                                                 |
| Protease inhibitor cocktail                                          | GenDEPOT                  | P3100                                                 |
| 5X SDS-PAGE loading buffer                                           | Biosesang                 | SF2002-110-00                                         |
| BMP2                                                                 | R&D Systems               | 355-BM                                                |
| K02288                                                               | MedChemExpress            | HY-12278                                              |
| NE-PER Nuclear and Cytoplasmic Extraction Reagents kit               | Thermo Fisher             | 78833                                                 |

|                                        |                 |           |
|----------------------------------------|-----------------|-----------|
| Chemiluminescent HRP substrate         | Merck Millipore | WBKLS0500 |
| Restore™ Western Blot Stripping Buffer | Thermo Fisher   | 21059     |
| Lipofectamine LTX with Plus Reagent    | Thermo Fisher   | 15338030  |
| Pierce™ HA-Tag Magnetic IP/Co-IP Kit   | Thermo Fisher   | 88838     |
