# Supplementary material for: TXNIP Suppresses the Osteochondrogenic Switch of Vascular Smooth Muscle Cells in Atherosclerosis
Source: PubMed Central journal article supplement — Circ Res. 2022 Dec 1;132(1):52–71. doi: 10.1161/CIRCRESAHA.122.321538 (PMC9829043; doi:10.1161/circresaha.122.321538), 2022-12-01

**Figure 6C**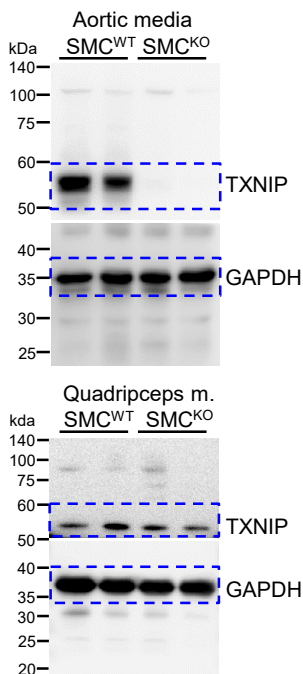**Figure 7C**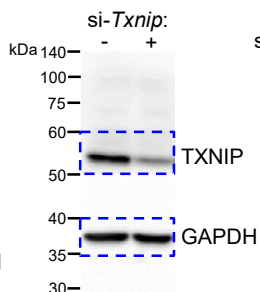**Figure 8A**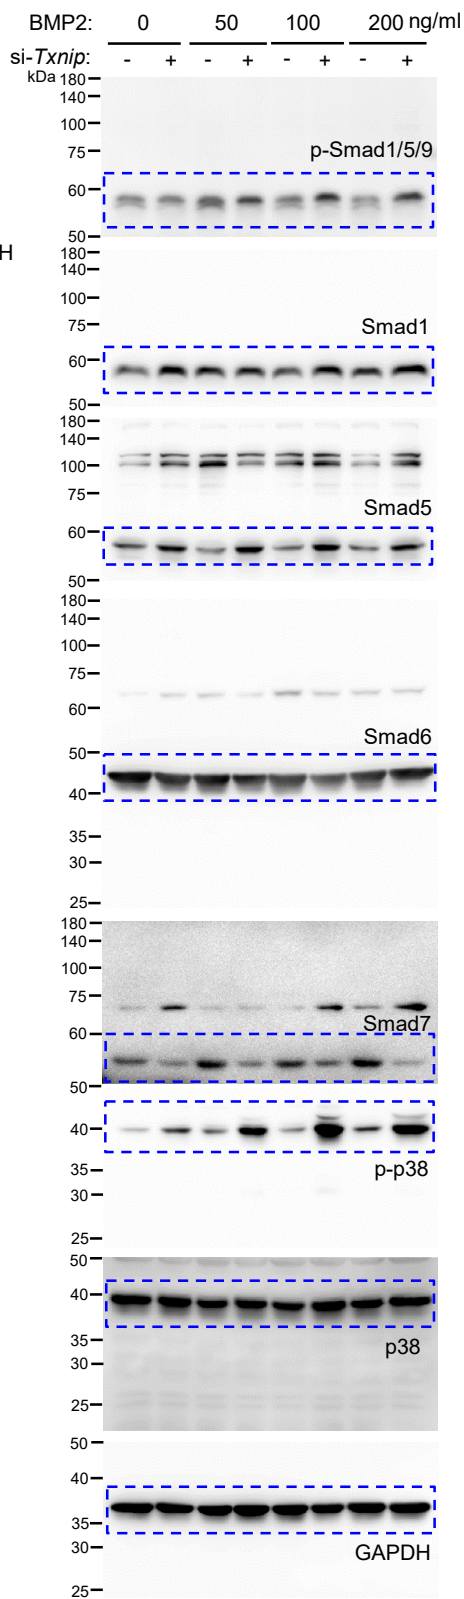**Figure 8B**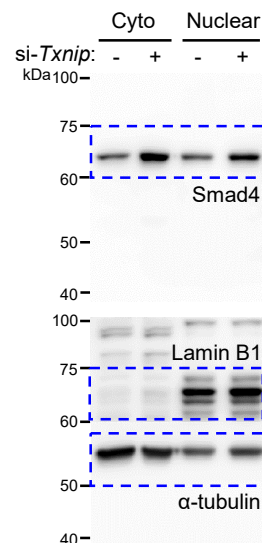

**Figure 8E**

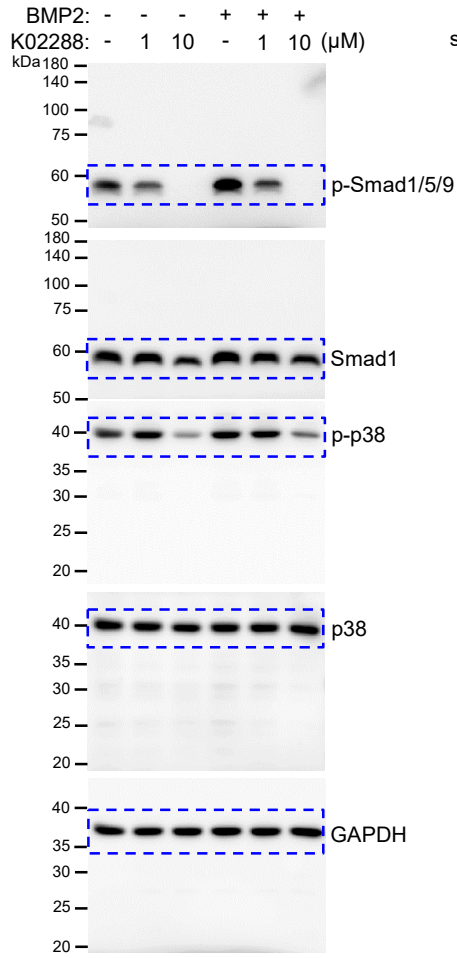

**Figure 8G**

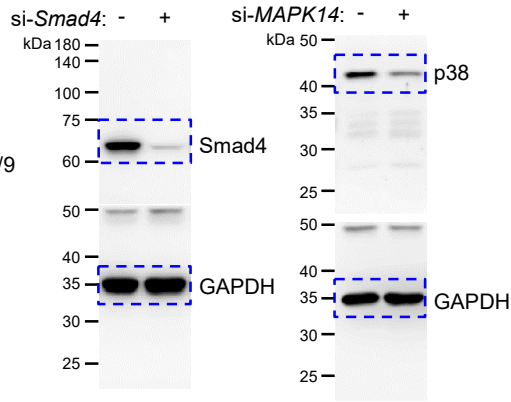

**Figure 8H**

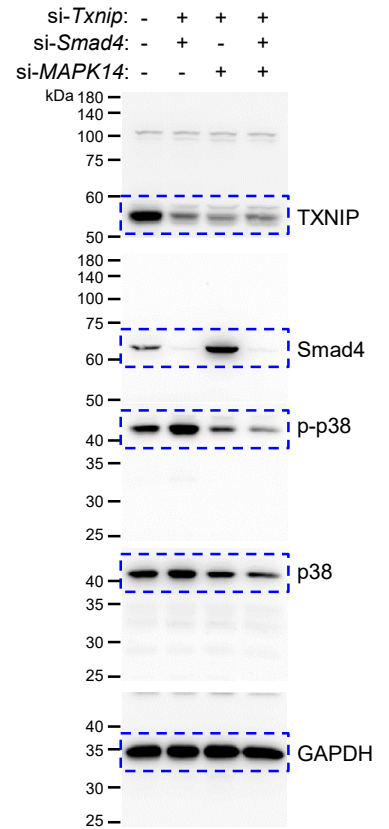

**Figure S12B**

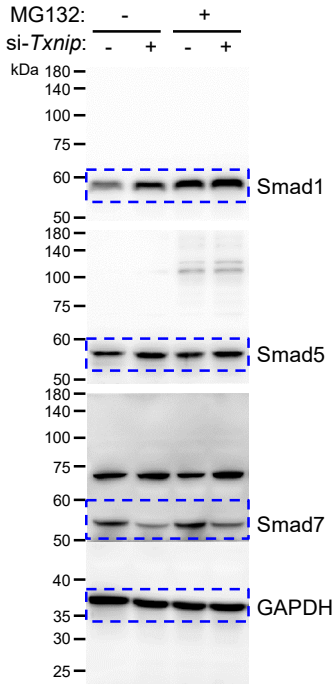

**Figure S12C**

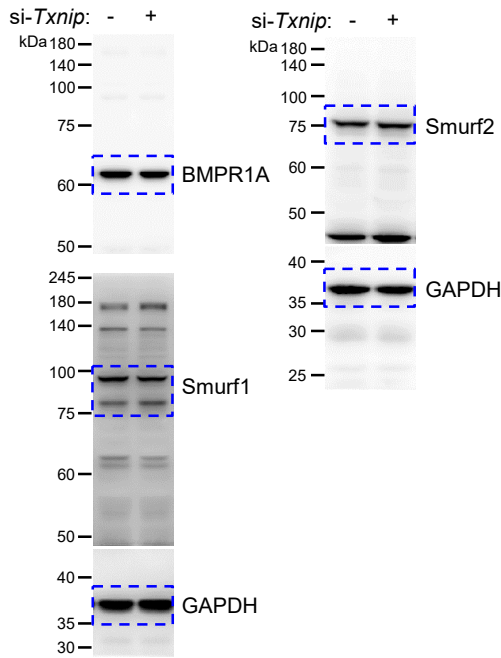

**Figure S12D**

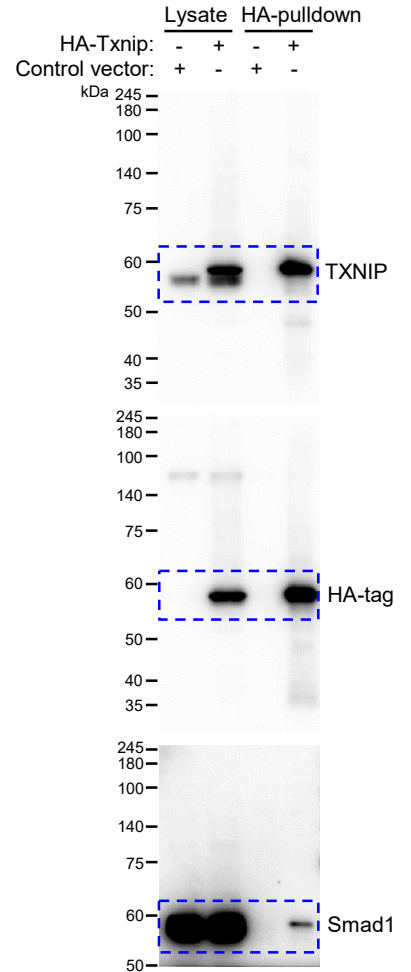

**Figure S12F**

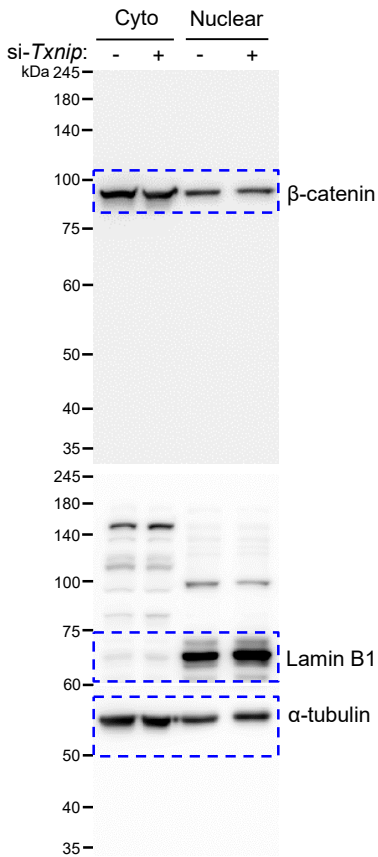

Supplement: res-132-052-s005.pdf [file res-132-052-s005.pdf]
